# Supplementary material for: A general framework for identifying oligogenic combinations of rare variants in complex disorders
Source: HighWire-hosted journal article supplement (doi:10.1101/gr.276348.121), 2022-03-17
Supplement: Supplemental_Table_S2.xlsx [file Supplemental_Table_S2.xlsx]

## Sheet: Supp_Table_S2
Supplemental Table S2 - Page 1 of 1
This table shows the enrichment for specific variant types within 148 significant gene pairs in probands with Intellectual Disability (ID). Only missense, stop-loss, and stop-gain mutations were part of all analyses.
Column Explanations
Variant 1 - Type of variant within the first gene in the significant gene pair
Variant 2 - Type of variant within the second gene in the significant gene pair
Expected Proportion - Proportion of all variant combinations belonging to the specific pair of variant categories, obtained when considering all possible variant pairs within the cohort
Observed Proportion - Proportion of variant combinations belonging to the specific pair of variant categories as observed within the subset of significant gene pairs
One-tailed Binomial Test - Type of one-tailed binomial test used
p-value - p-values from the binomial tests, where applicable
Variant 1	Variant 2	Expected Proportion	Observed Proportion	One-tailed Binomial Test	p-value
Missense	Missense	0.939	0.9564	Greater	0.015
Missense	Stopgain	0.0589	0.0436	Less	0.58
Stopgain	Stopgain	0.001	0
Missense	Stoploss	0.001	0
Stopgain	Stoploss	~0%	0
Stoploss	Stopless	~0%	0
