# Supplementary material for: A general framework for identifying oligogenic combinations of rare variants in complex disorders
Source: HighWire-hosted journal article supplement (doi:10.1101/gr.276348.121), 2022-03-17
Supplement: Supplemental_Table_S4.xlsx [file Supplemental_Table_S4.xlsx]

## Sheet: Supp_Table_S4
Supplemental Table S4 - Page 1 of 1
This table shows the list of 115 gene pairs identified by RareComb as significant using a conservative approach that considers all combinations that meet the frequency threshold in cases for multiple-testing correction, when comparing 1,215 probands diagnosed with intellectual disability (ID) with 4,974 probands without ID
Row Explanations
Each row represents a significant gene pair along with the metrics calculated by RareComb
Column Explanations
Item_1 - Name of the first gene in the combination
Item_2 - Name of the second gene in the combination.
Case_Obs_Count_I1 - Observed frequency of the individual gene 'Item_1' in cases.
Case_Obs_Count_I2 - Observed frequency of the individual gene 'Item_2' in cases.
Case_Exp_Prob_Combo - Expected probability of the cooccurring event within the combination in cases.
Case_Obs_Prob_Combo - Observed probability of the cooccurring event within the combination in cases.
Case_Exp_Count_Combo - Expected frequency of the cooccurring event within the combination in cases.
Case_Obs_Count_Combo - Observed frequency of the cooccurring event within the combination in cases.
Case_pvalue_more - p-values from the one-tailed binomial test to evaluate if the observed frequency is greater than the expected frequency of cooccurring events in cases.
Cont_Obs_Count_I1 - Observed frequency of the individual gene 'Item_1' in controls.
Cont_Obs_Count_I2 - Observed frequency of the individual gene 'Item_2' in controls.
Cont_Exp_Prob_Combo - Expected probability of the cooccurring event within the combination in controls.
Cont_Obs_Prob_Combo - Observed probability of the cooccurring event within the combination in controls.
Cont_Exp_Count_Combo - Expected frequency of the cooccurring event within the combination in controls.
Cont_Obs_Count_Combo - Observed frequency of the cooccurring event within the combination in controls.
Control_pvalue_more - p-values from the one-tailed binomial test to evaluate if the observed frequency is greater than the expected frequency of cooccurring events in controls.
Case_Adj_Pval_BH - p-values of the combination in cases adjusted for multiple testing using the 'Benjamini-Hochberg' method.
Case_Adj_Pval_bonf - p-values of the combination in cases adjusted for multiple testing using the 'bonferroni' method.
Effect_Size - Effect size measured as Cohen's d capturing the magnitude of difference in frequency of cooccurring events between cases and controls.
Power_One_Pct - Available statistical power for the 2-sample 2-proportion test to compare the frequencies of cooccurring events in cases and controls at 1% significance threshold.
Power_Five_Pct - Available statistical power for the 2-sample 2-proportion test to compare the frequencies of cooccurring events in cases and controls at 5% significance threshold.
Item_1_SFARI_Ind - Indicates if the first gene in the gene pair is a SFARI gene
Item_2_SFARI_Ind - Indicates if the second gene in the gene pair is a SFARI gene
Item_1	Item_2	Case_Obs_Count_I1	Case_Obs_Count_I2	Case_Exp_Prob_Combo	Case_Obs_Prob_Combo	Case_Exp_Count_Combo	Case_Obs_Count_Combo	Case_pvalue_more	Cont_Obs_Count_I1	Cont_Obs_Count_I2	Cont_Exp_Prob_Combo	Cont_Obs_Prob_Combo	Cont_Exp_Count_Combo	Cont_Obs_Count_Combo	Control_pvalue_more	Case_Adj_Pval_BH	Case_Adj_Pval_bonf	Effect_Size	Power_One_Pct	Power_Five_Pct
ADGRE3	SPTA1	12	43	0.00034954	0.00576132	0.42	7	3.36173e-07	42	163	0.00027671	0	1.38	0	1	0	0.005	0.151953	0.985	0.997
NOP14	WIF1	24	10	0.000162577	0.00493827	0.2	6	6.88754e-08	60	28	6.79044e-05	0	0.34	0	1	0	0.001	0.140662	0.966	0.993
ADGRE3	SMIM8	12	23	0.000186963	0.00493827	0.23	6	1.55352e-07	42	54	9.16709e-05	0	0.46	0	1	0	0.002	0.140662	0.966	0.993
ADCY6	SPATA5L1	16	19	0.000205931	0.00493827	0.25	6	2.72021e-07	52	39	8.19703e-05	0	0.41	0	1	0	0.004	0.140662	0.966	0.993
ADCY6	ZNF175	16	18	0.000195092	0.00493827	0.24	6	1.98872e-07	52	31	6.51559e-05	0	0.32	0	1	0	0.003	0.140662	0.966	0.993
FGFR1	OR6K3	16	17	0.000184254	0.00493827	0.22	6	1.42722e-07	28	66	7.46948e-05	0	0.37	0	1	0	0.002	0.140662	0.966	0.993
QRFPR	RNF32	24	17	0.000276381	0.00493827	0.34	6	1.47835e-06	65	34	8.93266e-05	0	0.44	0	1	0	0.023	0.140662	0.966	0.993
CES5A	ZNF175	48	18	0.000585277	0.00658436	0.71	8	8.47768e-07	138	31	0.000172914	0.000201045	0.86	1	0.5769	0	0.013	0.134108	0.947	0.987
IFT140	KRT26	25	29	0.000491118	0.00740741	0.6	9	1.50757e-08	66	80	0.000213414	0.000402091	1.06	2	0.286862	0	0	0.132239	0.94	0.985
PKP1	SYNGR4	30	6	0.000121933	0.00411523	0.15	5	5.21695e-07	63	22	5.60211e-05	0	0.28	0	1	0	0.008	0.128388	0.925	0.98
AK9	KRT80	20	10	0.000135481	0.00411523	0.16	5	8.71552e-07	62	32	8.01918e-05	0	0.4	0	1	0	0.014	0.128388	0.925	0.98
NPC1	OR1C1	14	8	7.58692e-05	0.00411523	0.09	5	5.09636e-08	33	15	2.00075e-05	0	0.1	0	1	0	0.001	0.128388	0.925	0.98
HHIP	TSKS	22	9	0.000134126	0.00411523	0.16	5	8.29966e-07	40	38	6.14373e-05	0	0.31	0	1	0	0.013	0.128388	0.925	0.98
C6orf141	MCOLN2	9	17	0.000103643	0.00411523	0.13	5	2.35774e-07	21	59	5.00795e-05	0	0.25	0	1	0	0.004	0.128388	0.925	0.98
C6orf141	CEP295	9	24	0.000146319	0.00411523	0.18	5	1.26673e-06	21	64	5.43235e-05	0	0.27	0	1	0	0.02	0.128388	0.925	0.98
CDON	SPATA5L1	11	19	0.000141577	0.00411523	0.17	5	1.07948e-06	36	39	5.67487e-05	0	0.28	0	1	0	0.017	0.128388	0.925	0.98
SLC10A6	WDR27	11	20	0.000149029	0.00411523	0.18	5	1.38467e-06	38	108	0.000165881	0	0.83	0	1	0	0.022	0.128388	0.925	0.98
KDM5A	ZNF175	12	18	0.000146319	0.00411523	0.18	5	1.26673e-06	33	31	4.13489e-05	0	0.21	0	1	0	0.02	0.128388	0.925	0.98
CTCFL	GRM8	11	14	0.00010432	0.00411523	0.13	5	2.43414e-07	23	39	3.62561e-05	0	0.18	0	1	0	0.004	0.128388	0.925	0.98
ACSS2	LAMB2	13	15	0.000132094	0.00411523	0.16	5	7.70537e-07	49	23	4.55525e-05	0	0.23	0	1	0	0.012	0.128388	0.925	0.98
GIMAP8	TIFA	16	13	0.0001409	0.00411523	0.17	5	1.05462e-06	49	20	3.96109e-05	0	0.2	0	1	0	0.016	0.128388	0.925	0.98
ARRDC4	TIFA	16	13	0.0001409	0.00411523	0.17	5	1.05462e-06	34	20	2.74851e-05	0	0.14	0	1	0	0.016	0.128388	0.925	0.98
AMACR	ZNF106	14	13	0.000123287	0.00411523	0.15	5	5.5058e-07	59	27	6.43879e-05	0	0.32	0	1	0	0.009	0.128388	0.925	0.98
CES5A	LMF1	48	31	0.00100798	0.00823045	1.22	10	6.71333e-07	138	73	0.000407184	0.000804182	2.03	4	0.14744	0	0.01	0.12497	0.908	0.974
CSGALNACT1	IFT140	18	25	0.000304832	0.00576132	0.37	7	1.35181e-07	75	66	0.000200075	0.000201045	1	1	0.630378	0	0.002	0.123594	0.901	0.971
FETUB	ZNF106	39	13	0.000343444	0.00576132	0.42	7	2.99126e-07	96	27	0.000104767	0.000201045	0.52	1	0.406155	0	0.005	0.123594	0.901	0.971
COL4A4	TTYH2	30	15	0.000304832	0.00576132	0.37	7	1.35181e-07	106	34	0.000145671	0.000201045	0.72	1	0.515492	0	0.002	0.123594	0.901	0.971
FRMD4A	TIMD4	14	23	0.000218124	0.00576132	0.27	7	1.4225e-08	24	70	6.79044e-05	0.000201045	0.34	1	0.286639	0	0	0.123594	0.901	0.971
NIN	OR5L2	15	25	0.000254026	0.00576132	0.31	7	3.97982e-08	28	57	6.45092e-05	0.000201045	0.32	1	0.274489	0	0.001	0.123594	0.901	0.971
ALLC	TAAR2	22	17	0.000253349	0.00576132	0.31	7	3.90891e-08	68	55	0.000151168	0.000201045	0.75	1	0.528562	0	0.001	0.123594	0.901	0.971
STAC	VIL1	18	20	0.000243865	0.00576132	0.3	7	3.02279e-08	49	47	9.30856e-05	0.000201045	0.46	1	0.370626	0	0	0.123594	0.901	0.971
KRTAP1.1	SLC22A14	28	20	0.000379346	0.00576132	0.46	7	5.77739e-07	76	37	0.000113659	0.000201045	0.57	1	0.431851	0	0.009	0.123594	0.901	0.971
FETUB	OR10H4	39	18	0.000475537	0.00658436	0.58	8	1.80984e-07	96	53	0.000205653	0.000402091	1.02	2	0.272673	0	0.003	0.12236	0.894	0.969
FBRSL1	TYRP1	21	38	0.000540568	0.00658436	0.66	8	4.70833e-07	102	102	0.000420522	0.000402091	2.09	2	0.618299	0	0.007	0.12236	0.894	0.969
KRTAP1.1	PCDH15	28	27	0.000512117	0.00658436	0.62	8	3.14908e-07	76	60	0.000184312	0.000402091	0.92	2	0.233656	0	0.005	0.12236	0.894	0.969
PCDHB6	VPS54	23	30	0.000467408	0.00658436	0.57	8	1.59038e-07	42	100	0.000169761	0.000402091	0.84	2	0.207241	0	0.002	0.12236	0.894	0.969
NIN	PKD1L2	15	40	0.000406442	0.00658436	0.49	8	5.54833e-08	28	166	0.000187869	0.000603136	0.93	3	0.0686322	0	0.001	0.113344	0.833	0.943
MMACHC	NRG1	23	36	0.00056089	0.00658436	0.68	8	6.18994e-07	68	80	0.000219881	0.000603136	1.09	3	0.0982957	0	0.01	0.113344	0.833	0.943
CEP295	CYP4A22	24	33	0.000536504	0.00658436	0.65	8	4.4517e-07	64	85	0.000219881	0.000603136	1.09	3	0.0982957	0	0.007	0.113344	0.833	0.943
ACTBL2	OR2Y1	38	24	0.000617792	0.00658436	0.75	8	1.26211e-06	134	68	0.0003683	0.000603136	1.83	3	0.277934	0	0.02	0.113344	0.833	0.943
CEP295	F12	24	7	0.000113804	0.00493827	0.14	6	8.52195e-09	64	10	2.58683e-05	0.000201045	0.13	1	0.120737	0	0	0.112303	0.825	0.939
BRD8	NGF	16	10	0.000108385	0.00493827	0.13	6	6.39494e-09	58	14	3.28204e-05	0.000201045	0.16	1	0.150623	0	0	0.112303	0.825	0.939
FAM186A	HHIP	10	22	0.000149029	0.00493827	0.18	6	4.14391e-08	42	40	6.79044e-05	0.000201045	0.34	1	0.286639	0	0.001	0.112303	0.825	0.939
KRT86	VIL1	13	20	0.000176125	0.00493827	0.21	6	1.0979e-07	30	47	5.69912e-05	0.000201045	0.28	1	0.246843	0	0.002	0.112303	0.825	0.939
OR13C3	UNC5B	10	39	0.000264187	0.00493827	0.32	6	1.14199e-06	12	108	5.23834e-05	0.000201045	0.26	1	0.229381	0	0.018	0.112303	0.825	0.939
IFT140	RPL10L	25	12	0.000203221	0.00493827	0.25	6	2.51943e-07	66	20	5.33534e-05	0.000201045	0.27	1	0.233091	0	0.004	0.112303	0.825	0.939
OR1L1	PTX4	14	12	0.000113804	0.00493827	0.14	6	8.52195e-09	33	43	5.73549e-05	0.000201045	0.29	1	0.248205	0	0	0.112303	0.825	0.939
DUSP13	HSD17B13	26	14	0.000246575	0.00493827	0.3	6	7.68714e-07	71	28	8.03535e-05	0.000201045	0.4	1	0.329475	0	0.012	0.112303	0.825	0.939
KIF24	LRR1	16	15	0.000162577	0.00493827	0.2	6	6.88754e-08	26	29	3.04761e-05	0.000201045	0.15	1	0.14066	0	0.001	0.112303	0.825	0.939
SRFBP1	ZNF510	24	12	0.000195092	0.00493827	0.24	6	1.98872e-07	59	22	5.24642e-05	0.000201045	0.26	1	0.229691	0	0.003	0.112303	0.825	0.939
ITPRIPL2	LGALS2	13	15	0.000132094	0.00493827	0.16	6	2.04494e-08	19	70	5.37576e-05	0.000201045	0.27	1	0.234631	0	0	0.112303	0.825	0.939
LMOD3	OR10H4	23	18	0.000280445	0.00493827	0.34	6	1.60694e-06	46	53	9.85422e-05	0.000201045	0.49	1	0.38748	0	0.025	0.112303	0.825	0.939
NIN	OR4C11	15	18	0.000182899	0.00493827	0.22	6	1.36731e-07	28	40	4.52696e-05	0.000201045	0.23	1	0.201624	0	0.002	0.112303	0.825	0.939
DEF6	ZNF175	22	18	0.000268252	0.00493827	0.33	6	1.24631e-06	73	31	9.14688e-05	0.000201045	0.45	1	0.365544	0	0.019	0.112303	0.825	0.939
DLST	LTBP4	13	27	0.000237769	0.00576132	0.29	7	2.54816e-08	22	81	7.20271e-05	0.000402091	0.36	2	0.0507188	0	0	0.111846	0.821	0.938
CEP192	OR5B21	15	29	0.000294671	0.00576132	0.36	7	1.07769e-07	30	88	0.000106707	0.000402091	0.53	2	0.0996637	0	0.002	0.111846	0.821	0.938
C6orf201	GPR3	33	15	0.000335315	0.00576132	0.41	7	2.55121e-07	80	37	0.000119641	0.000402091	0.6	2	0.120281	0	0.004	0.111846	0.821	0.938
GALNT11	KIF24	40	16	0.000433538	0.00576132	0.53	7	1.38984e-06	129	26	0.000135566	0.000402091	0.67	2	0.146917	0	0.022	0.111846	0.821	0.938
MLXIPL	NRG1	18	36	0.000438957	0.00576132	0.53	7	1.50751e-06	57	80	0.000184312	0.000402091	0.92	2	0.233656	0	0.023	0.111846	0.821	0.938
KLHDC4	ZNF671	18	19	0.000231672	0.00576132	0.28	7	2.1382e-08	83	37	0.000124128	0.000402091	0.62	2	0.127659	0	0	0.111846	0.821	0.938
NCAPD2	PKP1	22	30	0.000447086	0.00576132	0.54	7	1.69957e-06	95	63	0.000241909	0.000402091	1.2	2	0.338558	0	0.026	0.111846	0.821	0.938
ASAP3	ZNF671	29	19	0.000373249	0.00576132	0.45	7	5.19108e-07	79	37	0.000118146	0.000402091	0.59	2	0.117846	0	0.008	0.111846	0.821	0.938
BBOF1	LMOD3	23	23	0.000358346	0.00576132	0.44	7	3.96448e-07	64	46	0.000118994	0.000402091	0.59	2	0.119226	0	0.006	0.111846	0.821	0.938
LPA	TCFL5	56	21	0.000796627	0.00740741	0.97	9	8.43103e-07	236	66	0.000629571	0.00100523	3.13	5	0.207245	0	0.013	0.108925	0.796	0.926
ADAM2	NRG1	30	36	0.000731596	0.00740741	0.89	9	4.20175e-07	134	80	0.000433295	0.00100523	2.16	5	0.0676993	0	0.007	0.108925	0.796	0.926
CYP24A1	OR2Y1	27	24	0.000438957	0.00658436	0.53	8	9.9194e-08	104	68	0.000285845	0.000804182	1.42	4	0.0561875	0	0.002	0.105743	0.767	0.911
ACTBL2	SERPINA9	38	25	0.000643533	0.00658436	0.78	8	1.70228e-06	134	56	0.000303306	0.000804182	1.51	4	0.0667035	0	0.026	0.105743	0.767	0.911
ABCC2	OPRD1	57	22	0.000849464	0.00740741	1.03	9	1.41974e-06	193	68	0.000530462	0.00120627	2.64	6	0.0518726	0	0.022	0.102869	0.738	0.895
ETV3L	OR6P1	25	26	0.000440312	0.00576132	0.53	7	1.5382e-06	99	118	0.000472178	0.000603136	2.35	3	0.416832	0	0.024	0.10283	0.738	0.895
COL6A2	RIOK2	28	18	0.000341411	0.00576132	0.41	7	2.87567e-07	72	65	0.000189162	0.000603136	0.94	3	0.0697394	0	0.004	0.10283	0.738	0.895
COL12A1	TIAM2	31	21	0.00044099	0.00576132	0.54	7	1.55373e-06	146	48	0.000283258	0.000603136	1.41	3	0.168643	0	0.024	0.10283	0.738	0.895
AFMID	GRIN3B	9	37	0.000225575	0.00493827	0.27	6	4.60496e-07	27	157	0.000171337	0.000402091	0.85	2	0.210089	0	0.007	0.100555	0.714	0.881
MCMDC2	PKD2L1	34	12	0.000276381	0.00493827	0.34	6	1.47835e-06	93	44	0.000165396	0.000402091	0.82	2	0.199377	0	0.023	0.100555	0.714	0.881
DEFB124	ZNF385D	10	23	0.000155803	0.00493827	0.19	6	5.37282e-08	28	67	7.58265e-05	0.000402091	0.38	2	0.0555292	0	0.001	0.100555	0.714	0.881
HHIP	PMS1	22	17	0.000253349	0.00493827	0.31	6	8.9816e-07	40	68	0.00010994	0.000402091	0.55	2	0.10472	0	0.014	0.100555	0.714	0.881
FABP9	SRFBP1	14	24	0.000227608	0.00493827	0.28	6	4.84937e-07	42	59	0.000100159	0.000402091	0.5	2	0.0896482	0	0.008	0.100555	0.714	0.881
AOC3	TOP1MT	14	21	0.000199157	0.00493827	0.24	6	2.2412e-07	39	82	0.000129261	0.000402091	0.64	2	0.136227	0	0.003	0.100555	0.714	0.881
C1orf194	SRFBP1	15	24	0.000243865	0.00493827	0.3	6	7.21414e-07	34	59	8.10811e-05	0.000402091	0.4	2	0.0624317	0	0.011	0.100555	0.714	0.881
LAMB2	OR6P1	15	26	0.000264187	0.00493827	0.32	6	1.14199e-06	23	118	0.000109698	0.000402091	0.55	2	0.104338	0	0.018	0.100555	0.714	0.881
OR1L1	SYPL2	14	30	0.000284509	0.00493827	0.35	6	1.74452e-06	33	115	0.000153391	0.000402091	0.76	2	0.177956	0	0.027	0.100555	0.714	0.881
OR2Y1	PCDHGA1	24	15	0.000243865	0.00493827	0.3	6	7.21414e-07	68	38	0.000104443	0.000402091	0.52	2	0.0961669	0	0.011	0.100555	0.714	0.881
COL18A1	SIPA1	22	19	0.000283155	0.00493827	0.34	6	1.69763e-06	61	72	0.000177521	0.000402091	0.88	2	0.221296	0	0.026	0.100555	0.714	0.881
CHD1L	CYP2D6.CYP2D7	17	17	0.00019577	0.00493827	0.24	6	2.02909e-07	44	56	9.95931e-05	0.000402091	0.5	2	0.0887974	0	0.003	0.100555	0.714	0.881
MLXIPL	TEX37	18	21	0.000256059	0.00493827	0.31	6	9.54689e-07	57	45	0.000103675	0.000402091	0.52	2	0.0949887	0	0.015	0.100555	0.714	0.881
KLHDC4	ZNF175	18	18	0.000219479	0.00493827	0.27	6	3.93152e-07	83	31	0.000103999	0.000402091	0.52	2	0.0954842	0	0.006	0.100555	0.714	0.881
BUB1B	RNF32	18	17	0.000207285	0.00493827	0.25	6	2.82542e-07	54	34	7.42098e-05	0.000402091	0.37	2	0.0534631	0	0.004	0.100555	0.714	0.881
CPQ	VIL1	17	20	0.000230317	0.00493827	0.28	6	5.1917e-07	67	47	0.00012728	0.000402091	0.63	2	0.132906	0	0.008	0.100555	0.714	0.881
LRPAP1	PJA2	5	17	5.75793e-05	0.00411523	0.07	5	1.30695e-08	19	39	2.99507e-05	0.000201045	0.15	1	0.138411	0	0	0.100029	0.709	0.878
LMOD3	NAAA	23	10	0.000155803	0.00411523	0.19	5	1.71759e-06	46	37	6.87936e-05	0.000201045	0.34	1	0.289788	0	0.027	0.100029	0.709	0.878
PHRF1	TIFA	12	13	0.000105675	0.00411523	0.13	5	2.59283e-07	39	20	3.1527e-05	0.000201045	0.16	1	0.14514	0	0.004	0.100029	0.709	0.878
ITPRIPL2	MTCL1	13	11	9.68687e-05	0.00411523	0.12	5	1.69308e-07	19	37	2.84147e-05	0.000201045	0.14	1	0.131803	0	0.003	0.100029	0.709	0.878
C6orf141	CTAGE1	9	15	9.14495e-05	0.00411523	0.11	5	1.27653e-07	21	59	5.00795e-05	0.000201045	0.25	1	0.220499	0	0.002	0.100029	0.709	0.878
C6orf141	KIF2B	9	25	0.000152416	0.00411523	0.19	5	1.54408e-06	21	99	8.40317e-05	0.000201045	0.42	1	0.341632	0	0.024	0.100029	0.709	0.878
C11orf24	PPP1R36	11	14	0.00010432	0.00411523	0.13	5	2.43414e-07	19	45	3.45585e-05	0.000201045	0.17	1	0.157934	0	0.004	0.100029	0.709	0.878
NPC1	XRCC1	14	15	0.000142255	0.00411523	0.17	5	1.1048e-06	33	72	9.60362e-05	0.000201045	0.48	1	0.379796	0	0.017	0.100029	0.709	0.878
DGLUCY	FGF20	12	18	0.000146319	0.00411523	0.18	5	1.26673e-06	18	47	3.41947e-05	0.000201045	0.17	1	0.156409	0	0.02	0.100029	0.709	0.878
FAM171B	MST1R	11	18	0.000134126	0.00411523	0.16	5	8.29966e-07	20	65	5.2545e-05	0.000201045	0.26	1	0.230001	0	0.013	0.100029	0.709	0.878
OR2L13	ZNF506	13	18	0.000158512	0.00411523	0.19	5	1.86715e-06	33	74	9.87039e-05	0.000201045	0.49	1	0.387972	0	0.029	0.100029	0.709	0.878
MTR	TTYH2	14	15	0.000142255	0.00411523	0.17	5	1.1048e-06	41	34	5.63445e-05	0.000201045	0.28	1	0.244417	0	0.017	0.100029	0.709	0.878
CD36	LAMB2	13	15	0.000132094	0.00411523	0.16	5	7.70537e-07	39	23	3.62561e-05	0.000201045	0.18	1	0.165015	0	0.012	0.100029	0.709	0.878
HDC	TAF4B	13	17	0.000149706	0.00411523	0.18	5	1.41547e-06	34	48	6.59642e-05	0.000201045	0.33	1	0.279721	0	0.022	0.100029	0.709	0.878
DNASE1	VARS	18	26	0.000317025	0.00576132	0.39	7	1.75623e-07	84	105	0.000356498	0.000804182	1.77	4	0.10441	0	0.003	0.095229	0.655	0.845
CAPN3	OR2AE1	18	23	0.000280445	0.00493827	0.34	6	1.60694e-06	61	92	0.000226833	0.000603136	1.13	3	0.105321	0	0.025	0.091539	0.612	0.816
GAL3ST4	GNLY	21	20	0.000284509	0.00493827	0.35	6	1.74452e-06	89	61	0.000219436	0.000603136	1.09	3	0.0978531	0	0.027	0.091539	0.612	0.816
ACAN	OR2AE1	29	23	0.000451828	0.00576132	0.55	7	1.82076e-06	118	92	0.000438792	0.00100523	2.18	5	0.07058	0	0.028	0.0885316	0.576	0.79
LGALS2	MTCL1	15	11	0.000111772	0.00411523	0.14	5	3.41121e-07	70	37	0.000104686	0.000402091	0.52	2	0.0965399	0	0.005	0.0882811	0.573	0.788
ATF4	KRTAP26.1	24	8	0.000130061	0.00411523	0.16	5	7.14518e-07	98	19	7.52607e-05	0.000402091	0.37	2	0.0548029	0	0.011	0.0882811	0.573	0.788
LMOD3	ZNF585B	23	8	0.000124642	0.00411523	0.15	5	5.80712e-07	46	60	0.000111557	0.000402091	0.55	2	0.107273	0	0.009	0.0882811	0.573	0.788
CEP250	GCC1	13	18	0.000158512	0.00411523	0.19	5	1.86715e-06	43	53	9.21155e-05	0.000402091	0.46	2	0.0777914	0	0.029	0.0882811	0.573	0.788
KCNK15	OR5H6	18	13	0.000158512	0.00411523	0.19	5	1.86715e-06	44	49	8.71439e-05	0.000402091	0.43	2	0.0707334	0	0.029	0.0882811	0.573	0.788
CEP55	ZNF510	19	12	0.000154448	0.00411523	0.19	5	1.64644e-06	97	22	8.62547e-05	0.000402091	0.43	2	0.0694942	0	0.026	0.0882811	0.573	0.788
OR2B11	PROK1	14	15	0.000142255	0.00411523	0.17	5	1.1048e-06	50	49	9.90272e-05	0.000402091	0.49	2	0.087949	0	0.017	0.0882811	0.573	0.788
UBE2U	ZNF106	18	13	0.000158512	0.00411523	0.19	5	1.86715e-06	71	27	7.74837e-05	0.000402091	0.39	2	0.0576755	0	0.029	0.0882811	0.573	0.788
NEURL2	SNAP47	14	16	0.000151738	0.00411523	0.18	5	1.5111e-06	55	43	9.55916e-05	0.000402091	0.48	2	0.0828517	0	0.023	0.0882811	0.573	0.788
CELSR3	OR4K14	23	10	0.000155803	0.00411523	0.19	5	1.71759e-06	76	54	0.000165881	0.000603136	0.83	3	0.0510832	0	0.027	0.0792656	0.461	0.697
