# Supplementary material for: A general framework for identifying oligogenic combinations of rare variants in complex disorders
Source: HighWire-hosted journal article supplement (doi:10.1101/gr.276348.121), 2022-03-17
Supplement: Supplemental_Table_S5.xlsx [file Supplemental_Table_S5.xlsx]

## Sheet: Supp_Table_S5
Supplemental Table S5 - Page 1 of 1
This table shows the list of 199 gene pairs identified by RareComb as significant when using variants common between SPARK and SSC cohorts, and when considering both male and female probands, to compare 1,590 probands diagnosed with intellectual disability (ID) with 6,127 probands without ID
Row Explanations
Each row represents a significant gene pair along with the metrics calculated by RareComb
Column Explanations
Item_1 - Name of the first gene in the combination
Item_2 - Name of the second gene in the combination.
Case_Obs_Count_I1 - Observed frequency of the individual gene 'Item_1' in cases.
Case_Obs_Count_I2 - Observed frequency of the individual gene 'Item_2' in cases.
Case_Exp_Prob_Combo - Expected probability of the cooccurring event within the combination in cases.
Case_Obs_Prob_Combo - Observed probability of the cooccurring event within the combination in cases.
Case_Exp_Count_Combo - Expected frequency of the cooccurring event within the combination in cases.
Case_Obs_Count_Combo - Observed frequency of the cooccurring event within the combination in cases.
Case_pvalue_more - p-values from the one-tailed binomial test to evaluate if the observed frequency is greater than the expected frequency of cooccurring events in cases.
Cont_Obs_Count_I1 - Observed frequency of the individual gene 'Item_1' in controls.
Cont_Obs_Count_I2 - Observed frequency of the individual gene 'Item_2' in controls.
Cont_Exp_Prob_Combo - Expected probability of the cooccurring event within the combination in controls.
Cont_Obs_Prob_Combo - Observed probability of the cooccurring event within the combination in controls.
Cont_Exp_Count_Combo - Expected frequency of the cooccurring event within the combination in controls.
Cont_Obs_Count_Combo - Observed frequency of the cooccurring event within the combination in controls.
Control_pvalue_more - p-values from the one-tailed binomial test to evaluate if the observed frequency is greater than the expected frequency of cooccurring events in controls.
Case_Adj_Pval_BH - p-values of the combination in cases adjusted for multiple testing using the 'Benjamini-Hochberg' method.
Case_Adj_Pval_bonf - p-values of the combination in cases adjusted for multiple testing using the 'bonferroni' method.
Effect_Size - Effect size measured as Cohen's d capturing the magnitude of difference in frequency of cooccurring events between cases and controls.
Power_One_Pct - Available statistical power for the 2-sample 2-proportion test to compare the frequencies of cooccurring events in cases and controls at 1% significance threshold.
Power_Five_Pct - Available statistical power for the 2-sample 2-proportion test to compare the frequencies of cooccurring events in cases and controls at 5% significance threshold.
Item_1	Item_2	Case_Obs_Count_I1	Case_Obs_Count_I2	Case_Exp_Prob_Combo	Case_Obs_Prob_Combo	Case_Exp_Count_Combo	Case_Obs_Count_Combo	Case_pvalue_more	Cont_Obs_Count_I1	Cont_Obs_Count_I2	Cont_Exp_Prob_Combo	Cont_Obs_Prob_Combo	Cont_Exp_Count_Combo	Cont_Obs_Count_Combo	Control_pvalue_more	Case_Adj_Pval_BH	Case_Adj_Pval_bonf	Effect_Size	Power_One_Pct	Power_Five_Pct
IFT140	NOP14	28	25	0.000276888	0.00503145	0.44	8	2.33199e-08	76	39	7.89555e-05	0	0.48	0	1	0	0	0.141985	0.993	0.999
IFT140	KRT26	28	28	0.000310114	0.00440252	0.49	7	9.04346e-07	76	77	0.000155887	0	0.96	0	1	0	0.019	0.1328	0.984	0.997
CASQ1	IFT88	37	7	0.000102448	0.00377358	0.16	6	2.23696e-08	111	22	6.50504e-05	0	0.4	0	1	0	0	0.122936	0.963	0.992
NOP14	WIF1	25	10	9.88885e-05	0.00377358	0.16	6	1.818e-08	39	33	3.42833e-05	0	0.21	0	1	0	0	0.122936	0.963	0.992
CTCFL	GRM8	12	17	8.0693e-05	0.00377358	0.13	6	5.50093e-09	28	45	3.35641e-05	0	0.21	0	1	0	0	0.122936	0.963	0.992
LDB3	POU6F2	28	16	0.000177208	0.00377358	0.28	6	5.41525e-07	83	28	6.19071e-05	0	0.38	0	1	0	0.011	0.122936	0.963	0.992
CHD6	OR5M1	12	29	0.000137653	0.00377358	0.22	6	1.25501e-07	39	80	8.31111e-05	0	0.51	0	1	0	0.003	0.122936	0.963	0.992
ADGRE3	SMIM8	16	29	0.000183537	0.00377358	0.29	6	6.62743e-07	53	71	0.000100239	0	0.61	0	1	0	0.014	0.122936	0.963	0.992
SLC10A6	WDR27	15	27	0.000160199	0.00377358	0.25	6	3.02456e-07	50	123	0.000163825	0	1	0	1	0	0.006	0.122936	0.963	0.992
NIN	OR2B11	17	15	0.000100866	0.00377358	0.16	6	2.04189e-08	33	47	4.13158e-05	0	0.25	0	1	0	0	0.122936	0.963	0.992
KRTAP1-1	OR2B11	38	15	0.000225466	0.00377358	0.36	6	2.15231e-06	91	47	0.000113931	0	0.7	0	1	0	0.045	0.122936	0.963	0.992
KDM5A	ZNF175	18	24	0.000170879	0.00377358	0.27	6	4.39103e-07	36	47	4.50718e-05	0	0.28	0	1	0	0.009	0.122936	0.963	0.992
C9orf64	LYSMD4	34	16	0.000215181	0.00377358	0.34	6	1.64921e-06	107	28	7.98079e-05	0	0.49	0	1	0	0.034	0.122936	0.963	0.992
CASQ2	KRTAP19-2	16	21	0.000132906	0.00377358	0.21	6	1.02328e-07	64	75	0.000127863	0	0.78	0	1	0	0.002	0.122936	0.963	0.992
ADCY6	SPATA5L1	21	22	0.000182746	0.00377358	0.29	6	6.46477e-07	61	51	8.28713e-05	0	0.51	0	1	0	0.013	0.122936	0.963	0.992
CYP2D6;CYP2D7	FAM83D	22	18	0.000156639	0.00377358	0.25	6	2.65579e-07	71	47	8.88915e-05	0	0.54	0	1	0	0.006	0.122936	0.963	0.992
ADCY6	ZNF175	21	24	0.000199359	0.00377358	0.32	6	1.06547e-06	61	47	7.63716e-05	0	0.47	0	1	0	0.022	0.122936	0.963	0.992
NPC1	ZNF175	19	24	0.000180373	0.00377358	0.29	6	5.99629e-07	42	47	5.25837e-05	0	0.32	0	1	0	0.013	0.122936	0.963	0.992
CTAGE1	ZNF175	24	24	0.000227839	0.00377358	0.36	6	2.28455e-06	71	47	8.88915e-05	0	0.54	0	1	0	0.048	0.122936	0.963	0.992
KRTAP1-1	SLC22A14	38	25	0.000375776	0.00628931	0.6	10	9.06307e-10	91	47	0.000113931	0.000326424	0.7	2	0.155124	0	0	0.122641	0.963	0.992
F3	OR2Y1	7	30	8.30663e-05	0.00314465	0.13	5	2.98277e-07	22	86	5.03994e-05	0	0.31	0	1	0	0.006	0.112213	0.921	0.979
NPC1	OR1C1	19	9	6.76397e-05	0.00314465	0.11	5	1.08975e-07	42	19	2.12573e-05	0	0.13	0	1	0	0.002	0.112213	0.921	0.979
RHPN2	ZNF835	21	10	8.30663e-05	0.00314465	0.13	5	2.98277e-07	70	22	4.10228e-05	0	0.25	0	1	0	0.006	0.112213	0.921	0.979
CDON	SPATA5L1	11	22	9.57241e-05	0.00314465	0.15	5	5.96161e-07	43	51	5.84175e-05	0	0.36	0	1	0	0.012	0.112213	0.921	0.979
ACO1	CARMIL1	32	9	0.00011392	0.00314465	0.18	5	1.38948e-06	109	22	6.38783e-05	0	0.39	0	1	0	0.029	0.112213	0.921	0.979
EFS	MAML2	11	14	6.09153e-05	0.00314465	0.1	5	6.51327e-08	21	38	2.12573e-05	0	0.13	0	1	0	0.001	0.112213	0.921	0.979
SLC22A14	USP45	25	11	0.000108777	0.00314465	0.17	5	1.11043e-06	47	19	2.37879e-05	0	0.15	0	1	0	0.023	0.112213	0.921	0.979
BAHD1	ENDOU	12	16	7.59464e-05	0.00314465	0.12	5	1.92354e-07	20	63	3.35641e-05	0	0.21	0	1	0	0.004	0.112213	0.921	0.979
PRR14L	SPATA4	15	13	7.7133e-05	0.00314465	0.12	5	2.07534e-07	42	23	2.57325e-05	0	0.16	0	1	0	0.004	0.112213	0.921	0.979
CCDC138	SPATA4	24	13	0.000123413	0.00314465	0.2	5	2.04758e-06	52	23	3.18592e-05	0	0.2	0	1	0	0.043	0.112213	0.921	0.979
AMACR	ZNF106	17	13	8.74174e-05	0.00314465	0.14	5	3.82822e-07	66	35	6.15342e-05	0	0.38	0	1	0	0.008	0.112213	0.921	0.979
HDC	NAA11	16	13	8.22752e-05	0.00314465	0.13	5	2.84638e-07	44	33	3.86786e-05	0	0.24	0	1	0	0.006	0.112213	0.921	0.979
GAK	GRIP1	13	18	9.25596e-05	0.00314465	0.15	5	5.06028e-07	29	42	3.24453e-05	0	0.2	0	1	0	0.011	0.112213	0.921	0.979
CCDC63	PTPRQ	18	14	9.96796e-05	0.00314465	0.16	5	7.26154e-07	51	48	6.52102e-05	0	0.4	0	1	0	0.015	0.112213	0.921	0.979
ELP6	PCDHGA1	16	19	0.000120248	0.00314465	0.19	5	1.80569e-06	45	44	5.27436e-05	0	0.32	0	1	0	0.038	0.112213	0.921	0.979
GPRIN3	ZBTB39	19	16	0.000120248	0.00314465	0.19	5	1.80569e-06	69	28	5.14649e-05	0	0.32	0	1	0	0.038	0.112213	0.921	0.979
KCNJ11	OR2D2	12	42	0.000199359	0.00440252	0.32	7	4.77959e-08	43	161	0.000184416	0.000163212	1.13	1	0.676974	0	0.001	0.107249	0.892	0.968
CES5A	OR2B11	59	15	0.000350065	0.00440252	0.56	7	1.99925e-06	177	47	0.000221603	0.000163212	1.36	1	0.742803	0	0.042	0.107249	0.892	0.968
ELP6	POLM	16	27	0.000170879	0.00440252	0.27	7	1.68977e-08	45	166	0.000198987	0.000163212	1.22	1	0.704568	0	0	0.107249	0.892	0.968
COL4A4	TTYH2	35	18	0.000249199	0.00440252	0.4	7	2.12778e-07	131	44	0.000153542	0.000163212	0.94	1	0.609695	0	0.004	0.107249	0.892	0.968
ITPRIPL2	LGALS2	16	20	0.000126577	0.00440252	0.2	7	2.19814e-09	25	87	5.7938e-05	0.000163212	0.35	1	0.298824	0	0	0.107249	0.892	0.968
NIN	OR5L2	17	31	0.000208457	0.00440252	0.33	7	6.45064e-08	33	68	5.9776e-05	0.000163212	0.37	1	0.306677	0	0.001	0.107249	0.892	0.968
CEP295	TIAM2	29	22	0.000252363	0.00440252	0.4	7	2.31416e-07	79	64	0.000134683	0.000163212	0.83	1	0.561877	0	0.005	0.107249	0.892	0.968
FGFR1	OR6K3	21	22	0.000182746	0.00440252	0.29	7	2.65964e-08	35	83	7.73839e-05	0.000163212	0.47	1	0.377586	0	0.001	0.107249	0.892	0.968
NIN	PKD1L2	17	54	0.000363119	0.00566038	0.58	9	1.14701e-08	33	202	0.00017757	0.000489636	1.09	3	0.0971571	0	0	0.106354	0.886	0.966
SCRN2	SRFBP1	47	27	0.000501958	0.00566038	0.8	9	1.73727e-07	129	71	0.000243979	0.000489636	1.49	3	0.189848	0	0.004	0.106354	0.886	0.966
CEP295	CYP4A22	29	38	0.0004359	0.00566038	0.69	9	5.35669e-08	79	98	0.000206233	0.000489636	1.26	3	0.134569	0	0.001	0.106354	0.886	0.966
ABCC2	TSKS	69	14	0.000382105	0.00503145	0.61	8	2.6477e-07	243	41	0.000265396	0.000326424	1.63	2	0.483479	0	0.006	0.105848	0.882	0.964
C6orf201	GPR3	40	18	0.000284799	0.00503145	0.45	8	2.88931e-08	99	45	0.000118673	0.000326424	0.73	2	0.165275	0	0.001	0.105848	0.882	0.964
KRTAP1-1	PCDH15	38	28	0.000420869	0.00503145	0.67	8	5.43348e-07	91	76	0.00018423	0.000326424	1.13	2	0.311496	0	0.011	0.105848	0.882	0.964
MLXIPL	NRG1	22	45	0.000391598	0.00503145	0.62	8	3.17962e-07	64	105	0.000179008	0.000326424	1.1	2	0.299796	0	0.007	0.105848	0.882	0.964
AK9	PHETA2	32	22	0.00027847	0.00503145	0.44	8	2.43535e-08	71	68	0.000128609	0.000326424	0.79	2	0.186892	0	0.001	0.105848	0.882	0.964
GNLY	TET1	28	27	0.000299039	0.00503145	0.48	8	4.18462e-08	73	57	0.000110841	0.000326424	0.68	2	0.148576	0	0.001	0.105848	0.882	0.964
SCRN2	SGSH	47	45	0.000836597	0.00628931	1.33	10	1.40524e-06	129	99	0.000340196	0.00081606	2.08	5	0.0605553	0	0.029	0.101636	0.85	0.951
GRIP1	MAN2B2	18	64	0.000455678	0.00566038	0.72	9	7.76586e-08	42	203	0.000227117	0.000652848	1.39	4	0.052756	0	0.002	0.0995059	0.831	0.942
ADCY6	CES5A	21	59	0.000490091	0.00566038	0.78	9	1.42441e-07	61	177	0.000287612	0.000652848	1.76	4	0.102684	0	0.003	0.0995059	0.831	0.942
COL6A3	ENDOU	71	16	0.000449349	0.00503145	0.71	8	8.81681e-07	211	63	0.000354101	0.000489636	2.17	3	0.369126	0	0.018	0.0977256	0.815	0.935
CALML6	CFAP61	15	73	0.000433132	0.00503145	0.69	8	6.72087e-07	31	253	0.000208923	0.000489636	1.28	3	0.138306	0	0.014	0.0977256	0.815	0.935
GAL3ST4	GNLY	27	28	0.000299039	0.00503145	0.48	8	4.18462e-08	111	73	0.000215849	0.000489636	1.32	3	0.148085	0	0.001	0.0977256	0.815	0.935
CFAP58	ZNF175	53	24	0.000503145	0.00503145	0.8	8	2.02118e-06	149	47	0.000186547	0.000489636	1.14	3	0.108371	0	0.042	0.0977256	0.815	0.935
LRMDA	TTC37	24	31	0.000294292	0.00503145	0.47	8	3.70637e-08	59	87	0.000136734	0.000489636	0.84	3	0.0529936	0	0.001	0.0977256	0.815	0.935
C9orf64	CTRB1	34	30	0.000403465	0.00503145	0.64	8	3.97099e-07	107	93	0.000265076	0.000489636	1.62	3	0.222881	0	0.008	0.0977256	0.815	0.935
NINL	SMIM8	38	29	0.0004359	0.00503145	0.69	8	7.0451e-07	104	71	0.000196696	0.000489636	1.21	3	0.121616	0	0.015	0.0977256	0.815	0.935
PHC3	UGGT2	6	88	0.000208852	0.00377358	0.33	6	1.39058e-06	25	285	0.000189797	0.000163212	1.16	1	0.687452	0	0.029	0.0973848	0.812	0.933
CCDC73	GOLGA4	24	20	0.000189866	0.00377358	0.3	6	8.05328e-07	85	66	0.00014944	0.000163212	0.92	1	0.599759	0	0.017	0.0973848	0.812	0.933
FETUB	PLCZ1	48	10	0.000189866	0.00377358	0.3	6	8.05328e-07	118	16	5.02928e-05	0.000163212	0.31	1	0.265196	0	0.017	0.0973848	0.812	0.933
AFMID	POLRMT	11	48	0.000208852	0.00377358	0.33	6	1.39058e-06	37	170	0.000167554	0.000163212	1.03	1	0.641809	0	0.029	0.0973848	0.812	0.933
BRD8	NGF	16	12	7.59464e-05	0.00377358	0.12	6	3.84818e-09	70	17	3.16994e-05	0.000163212	0.19	1	0.176528	0	0	0.0973848	0.812	0.933
BPIFB1	TCF7L2	13	28	0.000143982	0.00377358	0.23	6	1.62953e-07	25	135	8.99038e-05	0.000163212	0.55	1	0.423549	0	0.003	0.0973848	0.812	0.933
FGGY	OR13C3	31	13	0.000159408	0.00377358	0.25	6	2.93918e-07	107	12	3.42034e-05	0.000163212	0.21	1	0.189065	0	0.006	0.0973848	0.812	0.933
OR13C3	UNC5B	13	44	0.000226257	0.00377358	0.36	6	2.19568e-06	12	133	4.25145e-05	0.000163212	0.26	1	0.229328	0	0.046	0.0973848	0.812	0.933
KIF24	LRR1	16	16	0.000101262	0.00377358	0.16	6	2.08928e-08	34	36	3.26051e-05	0.000163212	0.2	1	0.181085	0	0	0.0973848	0.812	0.933
CASP9	TMEM241	17	26	0.000174835	0.00377358	0.28	6	5.01045e-07	49	72	9.39794e-05	0.000163212	0.58	1	0.437767	0	0.01	0.0973848	0.812	0.933
IFT140	RPL10L	28	14	0.000155057	0.00377358	0.25	6	2.50419e-07	76	24	4.8588e-05	0.000163212	0.3	1	0.25748	0	0.005	0.0973848	0.812	0.933
DNAJC6	VPS13D	12	42	0.000199359	0.00377358	0.32	6	1.06547e-06	27	145	0.000104288	0.000163212	0.64	1	0.472184	0	0.022	0.0973848	0.812	0.933
OR1L1	PTX4	18	15	0.0001068	0.00377358	0.17	6	2.8542e-08	40	52	5.54074e-05	0.000163212	0.34	1	0.287867	0	0.001	0.0973848	0.812	0.933
DUSP13	HSD17B13	28	16	0.000177208	0.00377358	0.28	6	5.41525e-07	72	36	6.90461e-05	0.000163212	0.42	1	0.344961	0	0.011	0.0973848	0.812	0.933
LMOD3	ZBTB39	26	16	0.00016455	0.00377358	0.26	6	3.53133e-07	56	28	4.17686e-05	0.000163212	0.26	1	0.225797	0	0.007	0.0973848	0.812	0.933
TTC37	ZBTB39	31	16	0.000196195	0.00377358	0.31	6	9.72084e-07	87	28	6.48906e-05	0.000163212	0.4	1	0.328067	0	0.02	0.0973848	0.812	0.933
GNPTAB	GTDC1	18	19	0.000135279	0.00377358	0.22	6	1.13428e-07	51	49	6.65688e-05	0.000163212	0.41	1	0.334942	0	0.002	0.0973848	0.812	0.933
NIN	OR4C11	17	23	0.000154662	0.00377358	0.25	6	2.46742e-07	33	47	4.13158e-05	0.000163212	0.25	1	0.223646	0	0.005	0.0973848	0.812	0.933
COL6A2	NIN	26	17	0.000174835	0.00377358	0.28	6	5.01045e-07	55	33	4.83483e-05	0.000163212	0.3	1	0.256389	0	0.01	0.0973848	0.812	0.933
SPATA5L1	ZNF175	22	24	0.000208852	0.00377358	0.33	6	1.39058e-06	51	47	6.38517e-05	0.000163212	0.39	1	0.323777	0	0.029	0.0973848	0.812	0.933
COL6A1	S100A5	21	26	0.000215972	0.00377358	0.34	6	1.68413e-06	56	64	9.54712e-05	0.000163212	0.58	1	0.442883	0	0.035	0.0973848	0.812	0.933
KRTAP19-2	MICA	21	27	0.000224279	0.00377358	0.36	6	2.08858e-06	75	54	0.000107885	0.000163212	0.66	1	0.483688	0	0.044	0.0973848	0.812	0.933
CFAP61	FAM107B	73	12	0.000346505	0.00440252	0.55	7	1.87033e-06	253	38	0.000256099	0.000326424	1.57	2	0.46506	0	0.039	0.0966641	0.805	0.93
FETUB	ZNF106	48	13	0.000246826	0.00440252	0.39	7	1.99643e-07	118	35	0.000110016	0.000326424	0.67	2	0.146836	0	0.004	0.0966641	0.805	0.93
CSGALNACT1	IFT140	24	28	0.000265812	0.00440252	0.42	7	3.2673e-07	97	76	0.000196377	0.000326424	1.2	2	0.338536	0	0.007	0.0966641	0.805	0.93
ENPP3	PCDHB6	18	27	0.000192239	0.00440252	0.31	7	3.74193e-08	61	53	8.61212e-05	0.000326424	0.53	2	0.0987002	0	0.001	0.0966641	0.805	0.93
DHRS4;DHRS4L2	VARS	20	38	0.000300621	0.00440252	0.48	7	7.37038e-07	44	126	0.000147682	0.000326424	0.9	2	0.229289	0	0.015	0.0966641	0.805	0.93
MLXIPL	TEX37	22	24	0.000208852	0.00440252	0.33	7	6.53325e-08	64	60	0.000102291	0.000326424	0.63	2	0.130774	0	0.001	0.0966641	0.805	0.93
DOCK7	OR10H4	26	26	0.000267394	0.00440252	0.43	7	3.39848e-07	78	66	0.000137133	0.000326424	0.84	2	0.205727	0	0.007	0.0966641	0.805	0.93
ALLC	TAAR2	29	23	0.000263835	0.00440252	0.42	7	3.10934e-07	84	70	0.000156632	0.000326424	0.96	2	0.249414	0	0.006	0.0966641	0.805	0.93
CCDC138	PON3	24	36	0.000341759	0.00440252	0.54	7	1.7093e-06	52	98	0.000135748	0.000326424	0.83	2	0.202651	0	0.036	0.0966641	0.805	0.93
DUSP13	TET1	28	27	0.000299039	0.00440252	0.48	7	7.11857e-07	72	57	0.000109323	0.000326424	0.67	2	0.145379	0	0.015	0.0966641	0.805	0.93
CFAP61	PARD6B	73	16	0.000462007	0.00566038	0.73	9	8.714e-08	253	49	0.000330233	0.00081606	2.02	5	0.0547532	0	0.002	0.093472	0.772	0.913
KRT75	OR1L1	96	18	0.000683517	0.00566038	1.09	9	2.16457e-06	399	40	0.000425145	0.00081606	2.6	5	0.123223	0	0.045	0.093472	0.772	0.913
ACSM4	SCRN2	37	47	0.000687868	0.00566038	1.09	9	2.27778e-06	112	129	0.000384868	0.00081606	2.36	5	0.0906477	0	0.048	0.093472	0.772	0.913
NCOR2	NPSR1	61	10	0.000241288	0.00440252	0.38	7	1.71627e-07	229	28	0.000170804	0.000489636	1.05	3	0.0890376	0	0.004	0.0885414	0.716	0.882
AOC3	TOP1MT	16	26	0.00016455	0.00440252	0.26	7	1.30884e-08	55	96	0.000140649	0.000489636	0.86	3	0.0566963	0	0	0.0885414	0.716	0.882
HPX	NLRP14	17	48	0.000322772	0.00440252	0.51	7	1.17596e-06	48	107	0.000136814	0.000489636	0.84	3	0.0530679	0	0.025	0.0885414	0.716	0.882
COL6A1	TLL2	21	30	0.000249199	0.00440252	0.4	7	2.12778e-07	56	108	0.000161108	0.000489636	0.99	3	0.0779303	0	0.004	0.0885414	0.716	0.882
CNTRL	RHBDF2	22	38	0.000330683	0.00440252	0.53	7	1.3781e-06	59	96	0.000150879	0.000489636	0.92	3	0.066926	0	0.029	0.0885414	0.716	0.882
CCDC158	GZMA	31	24	0.000294292	0.00440252	0.47	7	6.40601e-07	110	48	0.000140649	0.000489636	0.86	3	0.0566963	0	0.013	0.0885414	0.716	0.882
ASAP3	TET1	33	27	0.000352439	0.00440252	0.56	7	2.08926e-06	96	57	0.000145764	0.000489636	0.89	3	0.0617118	0	0.044	0.0885414	0.716	0.882
ADAM2	NRG1	38	45	0.000676397	0.00566038	1.08	9	1.98975e-06	158	105	0.000441927	0.000979272	2.71	6	0.0573105	0	0.042	0.0880164	0.709	0.878
ABCC2	VEGFB	69	7	0.000191053	0.00377358	0.3	6	8.34665e-07	243	18	0.000116515	0.000326424	0.71	2	0.160641	0	0.017	0.0868	0.694	0.87
PINK1	TLL2	16	30	0.000189866	0.00377358	0.3	6	8.05328e-07	39	108	0.0001122	0.000326424	0.69	2	0.151448	0	0.017	0.0868	0.694	0.87
C1orf131	KRTAP1-1	11	38	0.000165342	0.00377358	0.26	6	3.63054e-07	36	91	8.72666e-05	0.000326424	0.53	2	0.100892	0	0.008	0.0868	0.694	0.87
KRT86	VIL1	14	21	0.000116293	0.00377358	0.18	6	4.69684e-08	41	59	6.44377e-05	0.000326424	0.39	2	0.0601606	0	0.001	0.0868	0.694	0.87
ACAD10	DZIP3	49	11	0.000213204	0.00377358	0.34	6	1.5645e-06	128	41	0.000139797	0.000326424	0.86	2	0.211655	0	0.033	0.0868	0.694	0.87
FAM171B	SERPINB11	12	45	0.000213599	0.00377358	0.34	6	1.58115e-06	24	176	0.00011252	0.000326424	0.69	2	0.152125	0	0.033	0.0868	0.694	0.87
FAM186A	HHIP	13	25	0.000128555	0.00377358	0.2	6	8.42977e-08	51	55	7.472e-05	0.000326424	0.46	2	0.0776848	0	0.002	0.0868	0.694	0.87
CEP295	TNFRSF10A	29	13	0.000149124	0.00377358	0.24	6	1.99748e-07	79	47	9.89075e-05	0.000326424	0.61	2	0.123877	0	0.004	0.0868	0.694	0.87
NCAPD2	SUSD2	28	16	0.000177208	0.00377358	0.28	6	5.41525e-07	118	48	0.000150879	0.000326424	0.92	2	0.236467	0	0.011	0.0868	0.694	0.87
FABP9	SRFBP1	16	27	0.000170879	0.00377358	0.27	6	4.39103e-07	47	71	8.88915e-05	0.000326424	0.54	2	0.104024	0	0.009	0.0868	0.694	0.87
OR8D4	OR13F1	20	24	0.000189866	0.00377358	0.3	6	8.05328e-07	64	81	0.000138092	0.000326424	0.85	2	0.207859	0	0.017	0.0868	0.694	0.87
ATF4	ZNF510	30	16	0.000189866	0.00377358	0.3	6	8.05328e-07	117	30	9.34999e-05	0.000326424	0.57	2	0.113046	0	0.017	0.0868	0.694	0.87
C1orf194	SRFBP1	18	27	0.000192239	0.00377358	0.31	6	8.6487e-07	44	71	8.32176e-05	0.000326424	0.51	2	0.0932069	0	0.018	0.0868	0.694	0.87
C1orf194	TTC37	18	31	0.000220719	0.00377358	0.35	6	1.90653e-06	44	87	0.000101971	0.000326424	0.62	2	0.130119	0	0.04	0.0868	0.694	0.87
CNKSR1	OR2L13	27	19	0.000202919	0.00377358	0.32	6	1.17917e-06	72	47	9.01435e-05	0.000326424	0.55	2	0.106455	0	0.025	0.0868	0.694	0.87
COL6A1	TIAM2	21	22	0.000182746	0.00377358	0.29	6	6.46477e-07	56	64	9.54712e-05	0.000326424	0.58	2	0.116965	0	0.013	0.0868	0.694	0.87
ANKK1	MCOLN2	26	20	0.000205688	0.00377358	0.33	6	1.27429e-06	106	72	0.000203302	0.000326424	1.25	2	0.353809	0	0.027	0.0868	0.694	0.87
OR2Y1	PCDHGA1	30	19	0.000225466	0.00377358	0.36	6	2.15231e-06	86	44	0.000100799	0.000326424	0.62	2	0.127722	0	0.045	0.0868	0.694	0.87
MLXIPL	STAC	22	24	0.000208852	0.00377358	0.33	6	1.39058e-06	64	64	0.00010911	0.000326424	0.67	2	0.144932	0	0.029	0.0868	0.694	0.87
DNASE1	NAALAD2	24	24	0.000227839	0.00377358	0.36	6	2.28455e-06	101	87	0.00023407	0.000326424	1.43	2	0.419914	0	0.048	0.0868	0.694	0.87
CCDC138	DNASE1	24	24	0.000227839	0.00377358	0.36	6	2.28455e-06	52	101	0.000139904	0.000326424	0.86	2	0.211892	0	0.048	0.0868	0.694	0.87
ADGRA1	CTAGE1	22	24	0.000208852	0.00377358	0.33	6	1.39058e-06	59	71	0.000111587	0.000326424	0.68	2	0.150151	0	0.029	0.0868	0.694	0.87
CCDC138	DOK7	24	24	0.000227839	0.00377358	0.36	6	2.28455e-06	52	89	0.000123281	0.000326424	0.76	2	0.175249	0	0.048	0.0868	0.694	0.87
COL9A2	LAMB4	18	14	9.96796e-05	0.00314465	0.16	5	7.26154e-07	95	47	0.000118939	0.000163212	0.73	1	0.517505	0	0.015	0.0866617	0.693	0.868
LRPAP1	PJA2	5	20	3.95554e-05	0.00314465	0.06	5	7.73438e-09	23	49	3.00212e-05	0.000163212	0.18	1	0.168017	0	0	0.0866617	0.693	0.868
NIPSNAP3B	PCDHB6	6	27	6.40797e-05	0.00314465	0.1	5	8.35526e-08	17	53	2.4001e-05	0.000163212	0.15	1	0.136754	0	0.002	0.0866617	0.693	0.868
HTR3A	SH2D4B	31	8	9.80974e-05	0.00314465	0.16	5	6.7172e-07	81	22	4.74692e-05	0.000163212	0.29	1	0.252373	0	0.014	0.0866617	0.693	0.868
GRIP1	PCDHB12	18	7	4.98398e-05	0.00314465	0.08	5	2.4232e-08	42	27	3.02077e-05	0.000163212	0.19	1	0.168967	0	0.001	0.0866617	0.693	0.868
FAM185A	KRT74	6	37	8.7813e-05	0.00314465	0.14	5	3.91358e-07	35	157	0.000146377	0.000163212	0.9	1	0.592174	0	0.008	0.0866617	0.693	0.868
SPEG	TET1	8	27	8.54397e-05	0.00314465	0.14	5	3.42322e-07	34	57	5.16248e-05	0.000163212	0.32	1	0.271169	0	0.007	0.0866617	0.693	0.868
NOP2	SLC2A12	29	10	0.000114711	0.00314465	0.18	5	1.43691e-06	98	29	7.57057e-05	0.000163212	0.46	1	0.371152	0	0.03	0.0866617	0.693	0.868
LDB3	PKP1	28	9	9.96796e-05	0.00314465	0.16	5	7.26154e-07	83	21	4.64303e-05	0.000163212	0.28	1	0.247598	0	0.015	0.0866617	0.693	0.868
ITPRIPL2	MTCL1	16	11	6.96175e-05	0.00314465	0.11	5	1.25539e-07	25	43	2.8636e-05	0.000163212	0.18	1	0.160925	0	0.003	0.0866617	0.693	0.868
CCDC38	NPSR1	20	10	7.91108e-05	0.00314465	0.13	5	2.34928e-07	60	28	4.47521e-05	0.000163212	0.27	1	0.239822	0	0.005	0.0866617	0.693	0.868
C6orf141	KIF2B	9	32	0.00011392	0.00314465	0.18	5	1.38948e-06	28	115	8.57749e-05	0.000163212	0.53	1	0.408779	0	0.029	0.0866617	0.693	0.868
C6orf141	MCOLN2	9	20	7.11997e-05	0.00314465	0.11	5	1.40176e-07	28	72	5.37025e-05	0.000163212	0.33	1	0.280389	0	0.003	0.0866617	0.693	0.868
FGF20	ZNF214	23	10	9.09774e-05	0.00314465	0.14	5	4.65199e-07	64	39	6.64888e-05	0.000163212	0.41	1	0.334616	0	0.01	0.0866617	0.693	0.868
MYO5C	SMIM8	11	29	0.000126182	0.00314465	0.2	5	2.27951e-06	29	71	5.4848e-05	0.000163212	0.34	1	0.285422	0	0.048	0.0866617	0.693	0.868
MOGAT3	TET1	10	27	0.0001068	0.00314465	0.17	5	1.01573e-06	22	57	3.34043e-05	0.000163212	0.2	1	0.185085	0	0.021	0.0866617	0.693	0.868
PHRF1	TIFA	16	14	8.86041e-05	0.00314465	0.14	5	4.08881e-07	49	26	3.3937e-05	0.000163212	0.21	1	0.187741	0	0.009	0.0866617	0.693	0.868
LYSMD4	NGF	16	12	7.59464e-05	0.00314465	0.12	5	1.92354e-07	28	17	1.26798e-05	0.000163212	0.08	1	0.0747482	0	0.004	0.0866617	0.693	0.868
FAM178B	SLC35A5	11	29	0.000126182	0.00314465	0.2	5	2.27951e-06	37	74	7.29353e-05	0.000163212	0.45	1	0.360386	0	0.048	0.0866617	0.693	0.868
CEP295	FAM178B	29	11	0.000126182	0.00314465	0.2	5	2.27951e-06	79	37	7.78633e-05	0.000163212	0.48	1	0.379412	0	0.048	0.0866617	0.693	0.868
PGLYRP3	TMC2	12	23	0.000109173	0.00314465	0.17	5	1.13018e-06	48	67	8.56683e-05	0.000163212	0.52	1	0.408393	0	0.024	0.0866617	0.693	0.868
BTBD16	NOP14	11	25	0.000108777	0.00314465	0.17	5	1.11043e-06	34	39	3.53222e-05	0.000163212	0.22	1	0.194605	0	0.023	0.0866617	0.693	0.868
ARRDC4	TIFA	18	14	9.96796e-05	0.00314465	0.16	5	7.26154e-07	36	26	2.49333e-05	0.000163212	0.15	1	0.141671	0	0.015	0.0866617	0.693	0.868
MTR	TULP3	18	13	9.25596e-05	0.00314465	0.15	5	5.06028e-07	51	30	4.07564e-05	0.000163212	0.25	1	0.220981	0	0.011	0.0866617	0.693	0.868
APOL1	DNAJC6	20	12	9.4933e-05	0.00314465	0.15	5	5.72526e-07	64	27	4.60307e-05	0.000163212	0.28	1	0.245754	0	0.012	0.0866617	0.693	0.868
DRD4	LAMB2	14	17	9.41418e-05	0.00314465	0.15	5	5.49637e-07	41	30	3.27649e-05	0.000163212	0.2	1	0.181886	0	0.011	0.0866617	0.693	0.868
GPR3	KIF24	18	16	0.00011392	0.00314465	0.18	5	1.38948e-06	45	34	4.07564e-05	0.000163212	0.25	1	0.220981	0	0.029	0.0866617	0.693	0.868
NAA11	TMC2	13	23	0.000118271	0.00314465	0.19	5	1.66633e-06	33	67	5.8897e-05	0.000163212	0.36	1	0.302932	0	0.035	0.0866617	0.693	0.868
GAK	TTPAL	13	20	0.000102844	0.00314465	0.16	5	8.45443e-07	29	46	3.55353e-05	0.000163212	0.22	1	0.195656	0	0.018	0.0866617	0.693	0.868
GAK	NLRC5	13	24	0.000123413	0.00314465	0.2	5	2.04758e-06	29	59	4.55779e-05	0.000163212	0.28	1	0.243658	0	0.043	0.0866617	0.693	0.868
BRD8	PCDHGA1	16	19	0.000120248	0.00314465	0.19	5	1.80569e-06	70	44	8.20455e-05	0.000163212	0.5	1	0.395113	0	0.038	0.0866617	0.693	0.868
CALML6	TMEM156	15	19	0.000112733	0.00314465	0.18	5	1.32066e-06	31	55	4.54181e-05	0.000163212	0.28	1	0.242917	0	0.028	0.0866617	0.693	0.868
LYSMD4	SULT1B1	16	19	0.000120248	0.00314465	0.19	5	1.80569e-06	28	77	5.74319e-05	0.000163212	0.35	1	0.296646	0	0.038	0.0866617	0.693	0.868
KCNK15	OR4B1	20	15	0.000118666	0.00314465	0.19	5	1.6935e-06	60	43	6.87265e-05	0.000163212	0.42	1	0.343676	0	0.035	0.0866617	0.693	0.868
DEFB124	NIN	14	17	9.41418e-05	0.00314465	0.15	5	5.49637e-07	39	33	3.42833e-05	0.000163212	0.21	1	0.189462	0	0.011	0.0866617	0.693	0.868
LPA	TCFL5	75	25	0.000741664	0.00628931	1.18	10	4.82296e-07	290	88	0.000679806	0.0013057	4.17	8	0.0615174	0	0.01	0.0864925	0.691	0.867
CFAP58	KCNH8	53	24	0.000503145	0.00503145	0.8	8	2.02118e-06	149	110	0.000436599	0.00081606	2.68	5	0.133358	0	0.042	0.0848433	0.67	0.854
COL12A1	TIAM2	41	22	0.00035679	0.00440252	0.57	7	2.26306e-06	179	64	0.000305167	0.000652848	1.87	4	0.120143	0	0.047	0.0816931	0.628	0.827
GALNT11	VANGL1	57	9	0.000202919	0.00377358	0.32	6	1.17917e-06	158	45	0.000189397	0.000489636	1.16	3	0.112032	0	0.025	0.0786774	0.587	0.798
ACAN	UTP15	40	14	0.00022151	0.00377358	0.35	6	1.94582e-06	141	36	0.000135215	0.000489636	0.83	3	0.0515903	0	0.041	0.0786774	0.587	0.798
CYP24A1	GTSF1L	36	12	0.000170879	0.00377358	0.27	6	4.39103e-07	130	52	0.000180074	0.000489636	1.1	3	0.100236	0	0.009	0.0786774	0.587	0.798
CDC14B	VARS	14	38	0.000210435	0.00377358	0.33	6	1.45189e-06	41	126	0.000137613	0.000489636	0.84	3	0.0538143	0	0.03	0.0786774	0.587	0.798
ATF4	OR2B11	30	15	0.000177999	0.00377358	0.28	6	5.55599e-07	117	47	0.000146483	0.000489636	0.9	3	0.0624331	0	0.012	0.0786774	0.587	0.798
FABP9	FGGY	16	31	0.000196195	0.00377358	0.31	6	9.72084e-07	47	107	0.000133963	0.000489636	0.82	3	0.0504471	0	0.02	0.0786774	0.587	0.798
CTRB1	ENPP3	30	18	0.000213599	0.00377358	0.34	6	1.58115e-06	93	61	0.000151118	0.000489636	0.93	3	0.0671752	0	0.033	0.0786774	0.587	0.798
GPR152	TCIRG1	27	11	0.00011748	0.00314465	0.19	5	1.61302e-06	106	38	0.000107299	0.000326424	0.66	2	0.14114	0	0.034	0.0760769	0.551	0.771
CASQ1	MTBP	37	8	0.000117084	0.00314465	0.19	5	1.58687e-06	111	37	0.000109403	0.000326424	0.67	2	0.145547	0	0.033	0.0760769	0.551	0.771
ACO1	ZNF530	32	9	0.00011392	0.00314465	0.18	5	1.38948e-06	109	29	8.42032e-05	0.000326424	0.52	2	0.0950614	0	0.029	0.0760769	0.551	0.771
ATF4	KRTAP26-1	30	8	9.4933e-05	0.00314465	0.15	5	5.72526e-07	117	19	5.92166e-05	0.000326424	0.36	2	0.0518656	0	0.012	0.0760769	0.551	0.771
MLXIP	TLL2	10	30	0.000118666	0.00314465	0.19	5	1.6935e-06	27	108	7.76769e-05	0.000326424	0.48	2	0.0829873	0	0.035	0.0760769	0.551	0.771
CCDC174	TMC2	13	23	0.000118271	0.00314465	0.19	5	1.66633e-06	47	67	8.38836e-05	0.000326424	0.51	2	0.0944588	0	0.035	0.0760769	0.551	0.771
ARFGAP3	MC2R	10	31	0.000122622	0.00314465	0.19	5	1.98486e-06	50	116	0.000154501	0.000326424	0.95	2	0.244615	0	0.041	0.0760769	0.551	0.771
POLM	USP34	27	10	0.0001068	0.00314465	0.17	5	1.01573e-06	166	41	0.000181299	0.000326424	1.11	2	0.304935	0	0.021	0.0760769	0.551	0.771
C1orf131	TMC2	11	23	0.000100075	0.00314465	0.16	5	7.40291e-07	36	67	6.42512e-05	0.000326424	0.39	2	0.0598569	0	0.015	0.0760769	0.551	0.771
ADGRA1	AFMID	22	11	9.57241e-05	0.00314465	0.15	5	5.96161e-07	59	37	5.81511e-05	0.000326424	0.36	2	0.0502272	0	0.012	0.0760769	0.551	0.771
NAGLU	SLC38A8	18	12	8.54397e-05	0.00314465	0.14	5	3.42322e-07	56	41	6.11612e-05	0.000326424	0.37	2	0.054904	0	0.007	0.0760769	0.551	0.771
PARP15	POMGNT2	20	12	9.4933e-05	0.00314465	0.15	5	5.72526e-07	80	32	6.81937e-05	0.000326424	0.42	2	0.0663881	0	0.012	0.0760769	0.551	0.771
CCBE1	SAMD11	11	27	0.00011748	0.00314465	0.19	5	1.61302e-06	45	79	9.46987e-05	0.000326424	0.58	2	0.115425	0	0.034	0.0760769	0.551	0.771
JCAD	SULT1B1	12	19	9.01863e-05	0.00314465	0.14	5	4.45786e-07	33	77	6.76876e-05	0.000326424	0.41	2	0.0655368	0	0.009	0.0760769	0.551	0.771
MROH7	WFDC3	26	11	0.000113128	0.00314465	0.18	5	1.3433e-06	102	28	7.60786e-05	0.000326424	0.47	2	0.0801074	0	0.028	0.0760769	0.551	0.771
DHRS4	WFDC3	25	11	0.000108777	0.00314465	0.17	5	1.11043e-06	82	28	6.11612e-05	0.000326424	0.37	2	0.054904	0	0.023	0.0760769	0.551	0.771
EFCAB11	SPATA5L1	14	22	0.000121831	0.00314465	0.19	5	1.92365e-06	49	51	6.65688e-05	0.000326424	0.41	2	0.0636683	0	0.04	0.0760769	0.551	0.771
PRX	RHCE	17	16	0.000107591	0.00314465	0.17	5	1.05281e-06	54	47	6.76077e-05	0.000326424	0.41	2	0.0654028	0	0.022	0.0760769	0.551	0.771
CCDC180	DDX11	20	15	0.000118666	0.00314465	0.19	5	1.6935e-06	57	48	7.2882e-05	0.000326424	0.45	2	0.074445	0	0.035	0.0760769	0.551	0.771
DOK7	GAK	24	13	0.000123413	0.00314465	0.2	5	2.04758e-06	89	29	6.87531e-05	0.000326424	0.42	2	0.0673333	0	0.043	0.0760769	0.551	0.771
CALML6	SULT1B1	15	19	0.000112733	0.00314465	0.18	5	1.32066e-06	31	77	6.35853e-05	0.000326424	0.39	2	0.0587768	0	0.028	0.0760769	0.551	0.771
CCDC33	KRTAP19-2	15	21	0.0001246	0.00314465	0.2	5	2.14459e-06	51	75	0.000101891	0.000326424	0.62	2	0.129955	0	0.045	0.0760769	0.551	0.771
OR3A2	OR4B1	20	15	0.000118666	0.00314465	0.19	5	1.6935e-06	78	43	8.93444e-05	0.000326424	0.55	2	0.104901	0	0.035	0.0760769	0.551	0.771
ETV3L	OR6P1	31	28	0.000343341	0.00440252	0.55	7	1.76164e-06	119	141	0.000446962	0.00081606	2.74	5	0.142837	0	0.037	0.0756592	0.545	0.767
GAL3ST4	LGALS2	27	20	0.000213599	0.00377358	0.34	6	1.58115e-06	111	87	0.000257245	0.000652848	1.58	4	0.0755344	0	0.033	0.0718291	0.491	0.723
