# Supplementary material for: A general framework for identifying oligogenic combinations of rare variants in complex disorders
Source: HighWire-hosted journal article supplement (doi:10.1101/gr.276348.121), 2022-03-17
Supplement: Supplemental_Table_S7.xlsx [file Supplemental_Table_S7.xlsx]

## Sheet: Supp_Table_S7
Supplemental Table S7 - Page 1 of 1
This table shows the list of 110 gene pairs identified by RareComb as significant when comparing 7,596 Autism probands with 11,740 unaffected parents
Row Explanations
Each row represents a significant gene pair along with the metrics calculated by RareComb
Column Explanations
Item_1 - Name of the first gene in the combination
Item_2 - Name of the second gene in the combination.
Case_Obs_Count_I1 - Observed frequency of the individual gene 'Item_1' in cases.
Case_Obs_Count_I2 - Observed frequency of the individual gene 'Item_2' in cases.
Case_Exp_Prob_Combo - Expected probability of the cooccurring event within the combination in cases.
Case_Obs_Prob_Combo - Observed probability of the cooccurring event within the combination in cases.
Case_Exp_Count_Combo - Expected frequency of the cooccurring event within the combination in cases.
Case_Obs_Count_Combo - Observed frequency of the cooccurring event within the combination in cases.
Case_pvalue_more - p-values from the one-tailed binomial test to evaluate if the observed frequency is greater than the expected frequency of cooccurring events in cases.
Cont_Obs_Count_I1 - Observed frequency of the individual gene 'Item_1' in controls.
Cont_Obs_Count_I2 - Observed frequency of the individual gene 'Item_2' in controls.
Cont_Exp_Prob_Combo - Expected probability of the cooccurring event within the combination in controls.
Cont_Obs_Prob_Combo - Observed probability of the cooccurring event within the combination in controls.
Cont_Exp_Count_Combo - Expected frequency of the cooccurring event within the combination in controls.
Cont_Obs_Count_Combo - Observed frequency of the cooccurring event within the combination in controls.
Control_pvalue_more - p-values from the one-tailed binomial test to evaluate if the observed frequency is greater than the expected frequency of cooccurring events in controls.
Case_Adj_Pval_BH - p-values of the combination in cases adjusted for multiple testing using the 'Benjamini-Hochberg' method.
Case_Adj_Pval_bonf - p-values of the combination in cases adjusted for multiple testing using the 'bonferroni' method.
Effect_Size - Effect size measured as Cohen's d capturing the magnitude of difference in frequency of cooccurring events between cases and controls.
Power_One_Pct - Available statistical power for the 2-sample 2-proportion test to compare the frequencies of cooccurring events in cases and controls at 1% significance threshold.
Power_Five_Pct - Available statistical power for the 2-sample 2-proportion test to compare the frequencies of cooccurring events in cases and controls at 5% significance threshold.
Item_1	Item_2	Case_Obs_Count_I1	Case_Obs_Count_I2	Case_Exp_Prob_Combo	Case_Obs_Prob_Combo	Case_Exp_Count_Combo	Case_Obs_Count_Combo	Case_pvalue_more	Cont_Obs_Count_I1	Cont_Obs_Count_I2	Cont_Exp_Prob_Combo	Cont_Obs_Prob_Combo	Cont_Exp_Count_Combo	Cont_Obs_Count_Combo	Control_pvalue_more	Case_Adj_Pval_BH	Case_Adj_Pval_bonf	Effect_Size	Power_One_Pct	Power_Five_Pct
MYO1H	XDH	492	338	0.00288212	0.00539758	21.89	41	0.000165562	710	492	0.00253447	0.00187394	29.75	22	0.940909	0.036	1	0.0604639	0.937	0.984
CYP2A13	DNAH3	88	902	0.00137569	0.00329121	10.45	25	9.11177e-05	116	1386	0.0011665	0.00076661	13.69	9	0.92814	0.028	1	0.0594186	0.928	0.981
DST	ZNF225	479	149	0.00123695	0.00289626	9.4	22	0.000308594	767	206	0.00114637	0.000681431	13.46	8	0.957667	0.047	1	0.0554715	0.883	0.965
DNHD1	KRT80	350	194	0.00117679	0.00302791	8.94	23	5.97505e-05	525	279	0.00106274	0.00076661	12.48	9	0.87392	0.025	1	0.054726	0.873	0.961
CFAP61	VPS13B	399	460	0.00318098	0.00592417	24.16	45	9.35886e-05	577	698	0.0029221	0.00247019	34.31	29	0.839743	0.029	1	0.0546467	0.872	0.96
ABCA8	NIN	489	182	0.00154245	0.0040811	11.72	31	2.05508e-06	737	246	0.00131543	0.00136286	15.44	16	0.477232	0.005	0.192	0.0540033	0.862	0.956
DYNC2H1	OCA2	271	296	0.00139024	0.00329121	10.56	25	0.000106867	411	419	0.00124945	0.000936968	14.67	11	0.864673	0.03	1	0.0535717	0.856	0.953
DNAH12	DNAI2	384	137	0.000911763	0.00276461	6.93	21	1.22674e-05	546	184	0.000728911	0.000681431	8.56	8	0.621868	0.013	1	0.0529933	0.847	0.949
KCNH6	MYO1H	314	492	0.00267747	0.00579252	20.34	44	3.52999e-06	427	710	0.00219963	0.00247019	25.82	29	0.290885	0.006	0.33	0.0529217	0.846	0.949
SHQ1	TARS	142	496	0.00122068	0.0035545	9.27	27	1.63187e-06	164	708	0.000842444	0.00110733	9.89	13	0.198078	0.005	0.152	0.0527448	0.843	0.948
ATP2C2	TALDO1	453	151	0.00118551	0.00302791	9.01	23	6.65499e-05	685	196	0.000974115	0.000851789	11.44	10	0.705006	0.026	1	0.0517294	0.826	0.94
COL16A1	UROC1	516	318	0.00284385	0.00618747	21.6	47	1.45472e-06	699	444	0.00225177	0.0028109	26.44	33	0.120829	0.005	0.136	0.051398	0.82	0.937
ABCC3	COL6A5	312	484	0.00261716	0.00513428	19.88	39	9.41442e-05	409	747	0.0022167	0.00212947	26.02	25	0.606048	0.029	1	0.0511055	0.815	0.935
CCDC180	GALNT11	184	224	0.000714325	0.00263296	5.43	20	1.17164e-06	259	323	0.000606968	0.000681431	7.13	8	0.420031	0.005	0.109	0.0504555	0.803	0.929
FAM149A	RGL4	191	139	0.000460128	0.00263296	3.5	20	1.08672e-09	285	187	0.000386679	0.000681431	4.54	8	0.0898445	0	0	0.0504555	0.803	0.929
SRRM4	SYNE1	85	969	0.00142749	0.0035545	10.84	27	2.5304e-05	98	1447	0.00102887	0.0011925	12.08	14	0.326768	0.018	1	0.050231	0.798	0.927
STXBP5L	TNXB	238	403	0.00166231	0.00368615	12.63	28	0.000126601	349	571	0.00144586	0.00127768	16.97	15	0.717285	0.032	1	0.0499975	0.794	0.924
ARHGAP8_PRR5_ARHGAP8	COL6A6	248	394	0.00169347	0.00368615	12.86	28	0.000170422	360	557	0.00145486	0.00127768	17.08	15	0.725701	0.037	1	0.0499975	0.794	0.924
ABCA7	CASQ1	433	174	0.00130577	0.00368615	9.92	28	1.89671e-06	607	209	0.000920447	0.00127768	10.81	15	0.132121	0.005	0.177	0.0499975	0.794	0.924
OR5H2	UNC5B	162	271	0.000760877	0.00276461	5.78	21	8.04025e-07	241	357	0.000624236	0.00076661	7.33	9	0.314608	0.004	0.075	0.0498252	0.79	0.923
COL9A1	OR51B5	282	175	0.000855298	0.00276461	6.5	21	4.78676e-06	400	255	0.000740055	0.00076661	8.69	9	0.502655	0.008	0.447	0.0498252	0.79	0.923
DNAH7	SPEG	1188	281	0.00578566	0.00934702	43.95	71	0.000101843	1776	383	0.00493521	0.00519591	57.94	61	0.36076	0.03	1	0.049372	0.781	0.918
ALPI	OTOG	81	419	0.000588206	0.00289626	4.47	22	2.48714e-09	126	578	0.000528399	0.000851789	6.2	10	0.0985814	0	0	0.0493067	0.78	0.918
DNAH9	TTC27	712	121	0.00149312	0.00447604	11.34	34	4.13464e-08	1057	166	0.00127305	0.00178876	14.95	21	0.0805872	0.001	0.004	0.0492938	0.78	0.917
IFIT1B	MYOM2	110	674	0.00128494	0.00302791	9.76	23	0.000209437	129	1058	0.000990237	0.000936968	11.63	11	0.612402	0.04	1	0.0488791	0.771	0.913
ACTL7A	CUBN	176	509	0.0015526	0.00342285	11.79	26	0.000234868	247	826	0.00148027	0.0011925	17.38	14	0.823135	0.042	1	0.0479981	0.753	0.903
ABCC3	TTLL4	312	253	0.00136806	0.00342285	10.39	26	3.26612e-05	409	353	0.00104752	0.0011925	12.3	14	0.350222	0.02	1	0.0479981	0.753	0.903
SERPINB11	SLC5A9	239	246	0.00101897	0.00342285	7.74	26	1.88573e-07	325	334	0.000787578	0.0011925	9.25	14	0.0868512	0.003	0.018	0.0479981	0.753	0.903
KCNH6	TLL2	314	240	0.00130608	0.00368615	9.92	28	1.90515e-06	427	302	0.000935618	0.00136286	10.98	16	0.0916614	0.005	0.178	0.0476514	0.745	0.899
COL6A5	MAMDC4	484	208	0.00174477	0.0038178	13.25	29	0.000121205	747	314	0.00170182	0.00144804	19.98	17	0.777812	0.032	1	0.0475308	0.743	0.898
FBN3	MYCBP2	854	150	0.00222013	0.00460769	16.86	35	7.28788e-05	1254	219	0.00199253	0.00195911	23.39	23	0.560056	0.027	1	0.0473117	0.738	0.895
CYP4F12	SPTA1	91	433	0.000682904	0.00263296	5.19	20	5.95896e-07	114	629	0.000520259	0.00076661	6.11	9	0.164042	0.004	0.056	0.0472874	0.737	0.895
GP6	OR10A5	150	252	0.000655122	0.00263296	4.98	20	3.16478e-07	210	350	0.000533275	0.00076661	6.26	9	0.180758	0.003	0.03	0.0472874	0.737	0.895
CRYBG1	MDN1	151	343	0.000897638	0.00263296	6.82	20	3.07595e-05	175	496	0.000629772	0.00076661	7.39	9	0.323441	0.02	1	0.0472874	0.737	0.895
ANTKMT	COL21A1	120	277	0.000576091	0.00263296	4.38	20	4.25075e-08	151	400	0.000438229	0.00076661	5.14	9	0.0779134	0.001	0.004	0.0472874	0.737	0.895
ATG2A	CRYBG1	341	151	0.000892404	0.00276461	6.78	21	8.96952e-06	449	175	0.000570096	0.000851789	6.69	10	0.139718	0.012	0.837	0.0468286	0.727	0.889
ECRG4	UTP20	118	464	0.000948921	0.00276461	7.21	21	2.18009e-05	179	699	0.000907808	0.000851789	10.66	10	0.621301	0.016	1	0.0468286	0.727	0.889
MCMDC2	VWA3A	163	214	0.000604549	0.00276461	4.59	21	1.96214e-08	221	318	0.000509898	0.000851789	5.99	10	0.0829249	0.001	0.002	0.0468286	0.727	0.889
CYP4F11	SEC14L4	184	313	0.000998142	0.00289626	7.58	22	1.49813e-05	243	442	0.000779278	0.000936968	9.15	11	0.311746	0.014	1	0.0464565	0.719	0.884
CEP112	MMACHC	244	215	0.000909198	0.00289626	6.91	22	3.62218e-06	345	235	0.000588235	0.000936968	6.91	11	0.0919126	0.007	0.338	0.0464565	0.719	0.884
FAT1	MYO18B	794	626	0.0086144	0.0127699	65.43	97	0.000146605	1161	887	0.0074717	0.00809199	87.72	95	0.231093	0.034	1	0.046337	0.716	0.882
DNAH7	UNC45B	1188	345	0.00710339	0.0109268	53.96	83	0.000137482	1776	476	0.00613358	0.00664395	72.01	78	0.254476	0.034	1	0.0462434	0.714	0.881
ABCC11	AQP6	428	143	0.00106074	0.00302791	8.06	23	1.25358e-05	607	207	0.000911639	0.00102215	10.7	12	0.385267	0.013	1	0.0461555	0.712	0.88
LPA	OR52N4	719	185	0.00230532	0.00539758	17.51	41	1.14934e-06	1042	248	0.00187492	0.00255537	22.01	30	0.0603525	0.005	0.107	0.0459246	0.706	0.877
C8A	COL21A1	253	277	0.00121459	0.00315956	9.23	24	3.5453e-05	344	400	0.000998349	0.00110733	11.72	13	0.392101	0.02	1	0.0459139	0.706	0.877
DNHD1	MFSD9	350	237	0.00143763	0.00329121	10.92	25	0.000176274	525	323	0.00123034	0.0011925	14.44	14	0.581887	0.037	1	0.0457221	0.702	0.874
GALNT11	TTC21B	224	297	0.00115301	0.00342285	8.76	26	1.78801e-06	323	420	0.000984273	0.00127768	11.56	15	0.189219	0.005	0.167	0.0455726	0.698	0.872
DNAH3	SERPINB11	902	239	0.00373624	0.00750395	28.38	57	1.41626e-06	1386	325	0.00326821	0.00408859	38.37	48	0.0736447	0.005	0.132	0.0454967	0.696	0.871
ABCC3	DBX1	312	214	0.00115717	0.0035545	8.79	27	6.09098e-07	409	312	0.000925852	0.00136286	10.87	16	0.0857095	0.004	0.057	0.0454593	0.695	0.87
PYGL	SPEG	317	281	0.00154382	0.0035545	11.73	27	9.12582e-05	500	383	0.00138942	0.00136286	16.31	16	0.563947	0.028	1	0.0454593	0.695	0.87
ABCC3	BCAR1	312	329	0.00177902	0.00460769	13.51	35	7.60787e-07	409	483	0.00143329	0.00204429	16.83	24	0.0577937	0.004	0.071	0.0454058	0.694	0.869
MTUS1	PSRC1	509	196	0.00172904	0.00368615	13.13	28	0.000236539	780	296	0.00167514	0.00144804	19.67	17	0.756861	0.042	1	0.0453774	0.694	0.869
ABCC11	PIK3C2B	428	216	0.00160224	0.00368615	12.17	28	6.94335e-05	607	317	0.00139608	0.00144804	16.39	17	0.472702	0.026	1	0.0453774	0.694	0.869
TLL2	XIRP1	240	374	0.00155565	0.0038178	11.82	29	1.68968e-05	302	504	0.00110434	0.00153322	12.96	18	0.107495	0.014	1	0.0453227	0.692	0.868
C8A	MDN1	253	343	0.00150399	0.0038178	11.42	29	9.19911e-06	344	496	0.00123795	0.00153322	14.53	18	0.212805	0.012	0.859	0.0453227	0.692	0.868
ATM	SAMD11	536	185	0.00171857	0.00434439	13.05	33	2.55002e-06	786	248	0.00141429	0.00187394	16.6	22	0.117234	0.005	0.238	0.0453146	0.692	0.868
MTMR11	TENM2	267	406	0.00187874	0.00434439	14.27	33	1.51743e-05	367	625	0.00166422	0.00187394	19.54	22	0.317627	0.014	1	0.0453146	0.692	0.868
CAND2	FETUB	484	169	0.00141763	0.0040811	10.77	31	3.70276e-07	707	229	0.00117468	0.00170358	13.79	20	0.0681569	0.003	0.035	0.0452817	0.691	0.868
LRP2	PLEC	717	1143	0.0142035	0.0200105	107.89	152	3.14519e-05	1026	1734	0.012908	0.0142249	151.54	167	0.111777	0.02	1	0.044764	0.679	0.86
LRP2	TSR1	717	249	0.0030942	0.00684571	23.5	52	2.57943e-07	1026	379	0.00282131	0.00366269	33.12	43	0.0558576	0.003	0.024	0.0445526	0.674	0.857
OR2C1	SERPINA9	138	290	0.000693597	0.00263296	5.27	20	7.53477e-07	196	403	0.000573093	0.000851789	6.73	10	0.142976	0.004	0.07	0.0442908	0.667	0.853
RHPN2	XIRP1	120	374	0.000777827	0.00263296	5.91	20	4.09752e-06	134	504	0.000490003	0.000851789	5.75	10	0.0678994	0.007	0.383	0.0442908	0.667	0.853
GCC1	WDR90	128	373	0.000827464	0.00263296	6.29	20	9.92787e-06	191	543	0.000752484	0.000851789	8.83	10	0.390744	0.012	0.927	0.0442908	0.667	0.853
ANTKMT	FMO2	120	317	0.000659281	0.00263296	5.01	20	3.48698e-07	151	470	0.000514919	0.000851789	6.05	10	0.0870132	0.003	0.033	0.0442908	0.667	0.853
FOXK2	SEC31B	227	259	0.00101896	0.00263296	7.74	20	0.000164755	341	360	0.000890678	0.000851789	10.46	10	0.597815	0.036	1	0.0442908	0.667	0.853
CASQ1	DPYD	174	248	0.000747878	0.00263296	5.68	20	2.31145e-06	209	310	0.00047008	0.000851789	5.52	10	0.0547123	0.005	0.216	0.0442908	0.667	0.853
KRT74	LRP2	227	717	0.00282082	0.00526593	21.43	40	0.000209743	346	1026	0.00257565	0.00255537	30.24	30	0.541623	0.04	1	0.0441168	0.663	0.85
AHNAK	GSTM5	866	226	0.003392	0.00645076	25.77	49	2.86786e-05	1271	333	0.00307081	0.00340716	36.05	40	0.276344	0.019	1	0.0439984	0.66	0.848
ABCC2	CCDC63	446	115	0.00088892	0.00276461	6.75	21	8.46939e-06	640	137	0.000636157	0.000936968	7.47	11	0.135003	0.012	0.791	0.0439783	0.659	0.848
ABCA7	RHPN2	433	120	0.000900532	0.00276461	6.84	21	1.02417e-05	607	134	0.000590143	0.000936968	6.93	11	0.0934458	0.012	0.956	0.0439783	0.659	0.848
CYP2B6	MFSD9	217	237	0.000891329	0.00276461	6.77	21	8.81248e-06	287	323	0.000672587	0.000936968	7.9	11	0.173875	0.012	0.823	0.0439783	0.659	0.848
CCDC170	KRT75	280	550	0.00266901	0.00500263	20.27	38	0.000274721	367	845	0.00225002	0.00238501	26.42	28	0.404345	0.044	1	0.0438648	0.657	0.846
CLTCL1	TMPRSS9	363	405	0.00254795	0.00500263	19.35	38	0.000112775	513	562	0.00209179	0.00238501	24.56	28	0.268907	0.03	1	0.0438648	0.657	0.846
MACF1	ZNF721	621	98	0.00105475	0.00289626	8.01	22	3.37109e-05	944	139	0.00095203	0.00102215	11.18	12	0.441843	0.02	1	0.0437329	0.653	0.844
ABCC2	CC2D1A	446	129	0.000997137	0.00289626	7.57	22	1.47581e-05	640	181	0.00084047	0.00102215	9.87	12	0.288162	0.014	1	0.0437329	0.653	0.844
ABCC3	IGF2R	312	159	0.000859769	0.00289626	6.53	22	1.50679e-06	409	241	0.000715162	0.00102215	8.4	12	0.142526	0.005	0.141	0.0437329	0.653	0.844
CCDC158	SEMA5B	205	337	0.00119733	0.00289626	9.09	22	0.000199556	263	482	0.000919743	0.00102215	10.8	12	0.396597	0.039	1	0.0437329	0.653	0.844
C8A	CYP2B6	253	217	0.000951503	0.00289626	7.23	22	7.28718e-06	344	287	0.000716315	0.00102215	8.41	12	0.143648	0.011	0.68	0.0437329	0.653	0.844
ADGRV1	C6	1004	69	0.00120064	0.00302791	9.12	23	8.00056e-05	1546	85	0.000953437	0.00110733	11.19	13	0.332593	0.028	1	0.0435432	0.648	0.841
LAMA2	MC5R	497	133	0.00114561	0.00302791	8.7	23	4.02199e-05	716	188	0.00097664	0.00110733	11.47	13	0.363152	0.022	1	0.0435432	0.648	0.841
CEL	HMCN1	81	740	0.00103884	0.00302791	7.89	23	9.06895e-06	87	1122	0.000708233	0.00110733	8.31	13	0.0800721	0.012	0.847	0.0435432	0.648	0.841
FUT2	TALDO1	379	151	0.000991851	0.00302791	7.53	23	4.37417e-06	542	196	0.00077076	0.00110733	9.05	13	0.127716	0.007	0.408	0.0435432	0.648	0.841
FBN3	GMIP	854	149	0.00220533	0.00447604	16.75	34	0.000137465	1254	217	0.00197434	0.00204429	23.18	24	0.459673	0.034	1	0.0434479	0.646	0.839
CHTF18	HMCN1	162	740	0.00207767	0.00447604	15.78	34	4.54e-05	221	1122	0.00179907	0.00204429	21.12	24	0.293047	0.023	1	0.0434479	0.646	0.839
ACOXL	CDK5RAP2	356	216	0.0013327	0.00315956	10.12	24	0.000141819	554	319	0.00128223	0.0011925	15.05	14	0.641987	0.034	1	0.0434001	0.645	0.838
DNAH11	OR10A5	815	252	0.00355949	0.00697736	27.04	53	6.25788e-06	1192	350	0.00302697	0.00383305	35.54	45	0.0700462	0.01	0.584	0.0433535	0.644	0.838
LAMA1	SCN4A	527	439	0.00400964	0.00697736	30.46	53	0.000129309	838	646	0.00392772	0.00383305	46.11	45	0.584945	0.033	1	0.0433535	0.644	0.838
HMCN1	LRMDA	740	85	0.00109014	0.00329121	8.28	25	2.09073e-06	1122	103	0.000838482	0.00127768	9.84	15	0.0754914	0.005	0.195	0.0432965	0.642	0.837
DCHS2	SUSD2	423	141	0.00103369	0.00329121	7.85	25	8.29663e-07	643	185	0.000863071	0.00127768	10.13	15	0.0904478	0.004	0.077	0.0432965	0.642	0.837
ABCB5	ERICH6	495	128	0.00109811	0.00329121	8.34	25	2.36911e-06	783	158	0.0008976	0.00127768	10.54	15	0.114394	0.005	0.221	0.0432965	0.642	0.837
SCIN	TG	164	375	0.00106587	0.00329121	8.1	25	1.41739e-06	233	539	0.000911189	0.00127768	10.7	15	0.124759	0.005	0.132	0.0432965	0.642	0.837
KIF25	TG	164	375	0.00106587	0.00329121	8.1	25	1.41739e-06	204	539	0.000797779	0.00127768	9.37	15	0.0544826	0.005	0.132	0.0432965	0.642	0.837
FAT2	TENM4	487	723	0.00610235	0.0104002	46.35	79	7.4801e-06	756	1063	0.00583068	0.00647359	68.45	76	0.194886	0.011	0.698	0.0432266	0.64	0.835
KRT7	PRKN	239	279	0.00115567	0.00342285	8.78	26	1.86225e-06	315	390	0.000891331	0.00136286	10.46	16	0.0666936	0.005	0.174	0.0432265	0.64	0.835
HEATR5A	HK2	472	198	0.00161971	0.00394945	12.3	30	1.37804e-05	639	296	0.00137232	0.00170358	16.11	20	0.195454	0.013	1	0.0431998	0.64	0.835
DHDH	KANK1	256	372	0.00165049	0.00394945	12.54	30	1.94248e-05	386	544	0.00152353	0.00170358	17.89	20	0.338951	0.016	1	0.0431998	0.64	0.835
ALX1	WWOX	353	266	0.00162737	0.00368615	12.36	28	8.96776e-05	544	364	0.00143669	0.00153322	16.87	18	0.423143	0.028	1	0.0431694	0.639	0.834
COL9A1	LRP2	282	717	0.00350428	0.00658241	26.62	50	3.24961e-05	400	1026	0.00297763	0.00357751	34.96	42	0.1349	0.02	1	0.0427466	0.628	0.827
BBS9	FRAS1	247	943	0.00403681	0.00750395	30.66	57	1.29188e-05	372	1380	0.00372465	0.00434412	43.73	51	0.152496	0.013	1	0.0415525	0.597	0.806
SLC6A13	TARS	124	496	0.00106594	0.00263296	8.1	20	0.000291484	182	708	0.000934907	0.000936968	10.98	11	0.537275	0.045	1	0.0414405	0.594	0.804
DNAH5	OR4B1	546	102	0.000965212	0.00263296	7.33	20	8.14534e-05	821	133	0.000792243	0.000936968	9.3	11	0.330199	0.028	1	0.0414405	0.594	0.804
NOP14	SH2B3	313	182	0.000987292	0.00263296	7.5	20	0.000109561	449	262	0.000853516	0.000936968	10.02	11	0.419498	0.03	1	0.0414405	0.594	0.804
CYP4F11	KRT7	184	239	0.000762159	0.00263296	5.79	20	3.04867e-06	243	315	0.000555368	0.000936968	6.52	11	0.0679068	0.006	0.285	0.0414405	0.594	0.804
COL6A6	DHDH	394	256	0.0017481	0.00421274	13.28	32	9.1696e-06	557	386	0.00155993	0.00195911	18.31	23	0.162896	0.012	0.856	0.0413499	0.592	0.802
CCDC69	DNAH3	64	902	0.0010005	0.00276461	7.6	21	4.59538e-05	92	1386	0.000925156	0.00102215	10.86	12	0.404176	0.023	1	0.0412547	0.589	0.8
ATM	OR4B1	536	102	0.000947535	0.00276461	7.2	21	2.13507e-05	786	133	0.000758469	0.00102215	8.9	12	0.187744	0.016	1	0.0412547	0.589	0.8
TARS	USP34	496	122	0.00104875	0.00276461	7.97	21	8.77938e-05	708	163	0.000837307	0.00102215	9.83	12	0.284006	0.028	1	0.0412547	0.589	0.8
KRT16	SPEG	195	281	0.000949666	0.00276461	7.21	21	2.20463e-05	280	383	0.000778073	0.00102215	9.13	12	0.210168	0.016	1	0.0412547	0.589	0.8
CAMTA1	LRP2	135	717	0.00167758	0.0040811	12.74	31	1.04741e-05	198	1026	0.00147393	0.00187394	17.3	22	0.155989	0.012	0.978	0.041249	0.589	0.8
DNAH3	ISX	902	98	0.00153201	0.0040811	11.64	31	1.79545e-06	1386	136	0.00136762	0.00187394	16.06	22	0.0914815	0.005	0.168	0.041249	0.589	0.8
